# Supplementary material for: Design a Database of Italian Vascular Alimurgic Flora (AlimurgITA): Preliminary Results
Source: MDPI journal article supplement (doi:10.3390/plants10040743), 2021-04-10
Supplement: s1 [file s1]

**Supplementary Materials Table S1.** List of taxa excluded from the AlimurgITA database region by region: A= Absent; CA=Casual alien/archaeophyte; NR= No longer recorded; D= Doubtfully occurring; RM= Reported by mistake; P=Present. The cultivated species are marked with an asterisk

| ENTITY                                                                    | AOV | PIE | LOM | TAA | VEN | FVG | LIG | EMR | TUS | UMB | MAR | ABR | LAT | CAM | MOL | APU | BAS | CAL | SIC | SAR | ITALY |
|---------------------------------------------------------------------------|-----|-----|-----|-----|-----|-----|-----|-----|-----|-----|-----|-----|-----|-----|-----|-----|-----|-----|-----|-----|-------|
| <i>Abelmoscus esculentus</i> (L.) Moench                                  | .   | .   | .   | .   | RM  | RM  | .   | .   | RM  | .   | .   | .   | .   | RM  | .   | CA  | RM  | RM  | CA  | RM  | A     |
| <i>Allium ampeloprasum</i> L.*                                            | .   | RM  | .   | .   | A   | RM  | .   | RM  | .   | .   | .   | .   | .   | RM  | .   | A   | .   | .   | .   | .   | .     |
| <i>Allium ascalonicum</i> Hort.*                                          | .   | .   | .   | .   | CA  | CA  | A   | .   | CA  | .   | .   | CA  | CA  | CA  | CA  | .   | CA  | A   | .   | CA  | .     |
| <i>Allium cepa</i> L.*                                                    | .   | CA  | .   | .   | CA  | CA  | A   | .   | CA  | .   | .   | CA  | CA  | CA  | CA  | .   | CA  | CA  | .   | CA  | .     |
| <i>Allium porrum</i> L.* (=Allium ampeloprasum L.)                        | .   | CA  | .   | .   | CA  | CA  | A   | .   | CA  | .   | .   | CA  | CA  | CA  | CA  | .   | CA  | CA  | .   | A   | .     |
| <i>Allium sativum</i> L.*                                                 | .   | CA  | CA  | CA  | CA  | CA  | A   | .   | CA  | .   | CA  | CA  | CA  | CA  | A   | .   | CA  | .   | CA  | CA  | .     |
| <i>Aloysia citrodora</i> Paláu                                            | A   | A   | .   | .   | A   | CA  | A   | A   | CA  | .   | .   | CA  | CA  | A   | .   | .   | A   | .   | .   | CA  | .     |
| <i>Ambrosia maritima</i> L. (= Ambrosia polystachya DC.)                  | .   | .   | .   | .   | .   | .   | .   | .   | .   | .   | .   | .   | .   | .   | .   | NR  | .   | .   | .   | P   | .     |
| <i>Anacamptis palustris</i> (Jacq.) R.M.Bateman, Pridgeon & M.W.Chase     | .   | .   | .   | .   | .   | .   | .   | .   | .   | .   | .   | .   | .   | .   | .   | .   | .   | .   | NR  | .   | .     |
| <i>Anethum graveolens</i> L.*                                             | .   | .   | .   | .   | CA  | .   | .   | .   | .   | .   | .   | .   | .   | .   | .   | .   | A   | A   | .   | CA  | .     |
| <i>Artemisia abrotanum</i> L. (= Artemisia alba Turra)                    | .   | .   | .   | .   | .   | NR  | .   | .   | .   | .   | .   | .   | .   | .   | .   | .   | .   | .   | .   | .   | .     |
| <i>Artemisia dracunculus</i> L.*                                          | .   | .   | .   | .   | A   | .   | .   | .   | .   | .   | .   | .   | .   | .   | .   | .   | .   | .   | .   | A   | .     |
| <i>Artemisia glacialis</i> L.                                             | .   | .   | .   | .   | .   | RM  | .   | .   | .   | .   | .   | .   | .   | .   | .   | .   | .   | .   | .   | .   | .     |
| <i>Avena sativa</i> L.*                                                   | .   | CA  | .   | .   | CA  | CA  | .   | CA  | .   | .   | CA  | .   | .   | .   | .   | CA  | CA  | .   | .   | .   | .     |
| <i>Blitum bonus-henricus</i> (L.) Rchb. (=Chenopodium bonus-henricus L.)  | .   | .   | .   | .   | .   | .   | .   | .   | .   | .   | .   | .   | .   | .   | .   | NR  | .   | .   | .   | .   | .     |
| <i>Camelina sativa</i> (L.) Crantz                                        | .   | .   | .   | .   | D   | .   | .   | .   | .   | .   | .   | .   | .   | .   | .   | A   | .   | CA  | .   | .   | .     |
| <i>Camellia sinensis</i> (L.) Kuntze*                                     | .   | .   | .   | .   | .   | .   | .   | A   | .   | .   | .   | .   | .   | .   | .   | .   | .   | .   | .   | A   | .     |
| <i>Canna indica</i> L.                                                    | .   | .   | .   | .   | .   | .   | .   | .   | .   | .   | .   | .   | .   | .   | .   | .   | .   | CA  | .   | .   | .     |
| <i>Capsicum annuum</i> L.*                                                | .   | .   | .   | .   | A   | .   | .   | .   | A   | .   | .   | .   | .   | CA  | A   | .   | CA  | CA  | .   | .   | .     |
| <i>Capsicum frutescens</i> L.*                                            | .   | .   | .   | .   | .   | .   | .   | .   | .   | .   | .   | .   | A   | .   | A   | .   | .   | .   | .   | .   | .     |
| <i>Carlina sicula</i> Ten.                                                | .   | .   | .   | .   | .   | .   | .   | .   | .   | .   | .   | .   | .   | .   | .   | RM  | .   | .   | P   | .   | .     |
| <i>Carthamus tinctorius</i> L.                                            | .   | .   | .   | .   | .   | .   | .   | .   | .   | .   | A   | .   | .   | .   | .   | .   | .   | .   | .   | .   | .     |
| <i>Centaurea benedicta</i> (L.) L.                                        | .   | .   | .   | .   | .   | .   | .   | .   | .   | .   | .   | .   | .   | .   | .   | .   | A   | .   | .   | .   | .     |
| <i>Chaerophyllum aromaticum</i> L.                                        | .   | .   | .   | .   | .   | CA  | A   | .   | .   | .   | .   | .   | .   | .   | .   | .   | .   | .   | .   | .   | .     |
| <i>Chamaemelum nobile</i> (L.) All.                                       | .   | .   | .   | .   | .   | .   | .   | .   | .   | .   | .   | .   | .   | .   | .   | .   | .   | .   | .   | A   | .     |
| <i>Chrysosplenium dubium</i> J.Gay ex Ser.                                | .   | .   | .   | .   | .   | .   | .   | .   | .   | .   | .   | .   | .   | .   | .   | A   | .   | .   | .   | .   | .     |
| <i>Cicer arietinum</i> L.*                                                | .   | .   | .   | .   | CA  | .   | .   | CA  | CA  | .   | .   | .   | .   | .   | A   | .   | A   | A   | .   | CA  | .     |
| <i>Citrullus lanatus</i> (Thunb.) Matsum. & Nakai subsp. <i>lanatus</i> * | .   | .   | .   | .   | CA  | .   | .   | .   | .   | .   | .   | .   | .   | .   | .   | .   | .   | .   | .   | .   | .     |
| <i>Citrus × aurantium</i> L.*                                             | .   | .   | .   | .   | .   | A   | .   | A   | .   | CA  | .   | A   | .   | .   | .   | A   | A   | A   | A   | CA  | .     |
| <i>Citrus deliciosa</i> Ten.* (= Citrus reticulata Blanco)                | .   | .   | .   | .   | .   | .   | .   | A   | .   | .   | .   | .   | .   | .   | .   | .   | .   | .   | .   | CA  | .     |
| <i>Citrus grandis</i> L.* (=Citrus maxima (Burm.) Merr.)                  | .   | .   | .   | .   | .   | .   | .   | A   | .   | .   | .   | .   | .   | .   | .   | .   | .   | .   | .   | .   | .     |
| <i>Citrus limon</i> (L.) Burm. F.*                                        | .   | .   | .   | .   | A   | A   | A   | .   | A   | .   | A   | A   | A   | CA  | .   | A   | A   | A   | A   | CA  | .     |
| <i>Citrus medica</i> L.*                                                  | .   | .   | .   | .   | A   | .   | .   | .   | .   | .   | .   | .   | .   | .   | .   | .   | .   | .   | .   | A   | .     |
| <i>Corydalis solida</i> (L.) Clairv. subsp. <i>solida</i>                 | .   | .   | .   | .   | .   | .   | .   | .   | .   | .   | .   | .   | .   | .   | .   | D   | .   | .   | .   | .   | .     |

[illegible]

|                                                                                            |    |    |    |   |    |    |    |    |    |   |    |    |    |    |    |   |    |    |    |    |    |
|--------------------------------------------------------------------------------------------|----|----|----|---|----|----|----|----|----|---|----|----|----|----|----|---|----|----|----|----|----|
| <i>Triticum aestivum</i> L.*                                                               | .  | .  | CA | . | CA | CA | CA | .  | CA | . | CA | .  | .  | .  | .  | A | .  | CA | .  | CA | .  |
| <i>Triticum aestivum</i> L. subsp. <i>spelta</i> (L.) Thell.*                              | .  | .  | .  | . | A  | .  | .  | .  | .  | . | .  | .  | .  | .  | .  | . | A  | .  | .  | .  | .  |
| <i>Triticum turgidum</i> L. subsp. <i>dicoccon</i> (Schrunk) Thell.*                       | .  | .  | .  | . | .  | .  | .  | .  | CA | . | .  | .  | .  | .  | .  | . | .  | .  | .  | .  | .  |
| <i>Triticum turgidum</i> L. subsp. <i>durum</i> (Desf.) Husn.*                             | .  | .  | .  | . | .  | .  | .  | .  | .  | . | .  | .  | .  | .  | .  | A | .  | CA | CA | .  | CA |
| <i>Tropaeolum majus</i> L.                                                                 | .  | .  | .  | . | .  | .  | .  | .  | .  | . | .  | .  | .  | .  | .  | . | CA | .  | .  | P  | .  |
| <i>Ulex europaeus</i> L. subsp. <i>europaeus</i>                                           | .  | .  | .  | . | .  | .  | .  | .  | .  | . | .  | .  | .  | .  | .  | . | D  | .  | .  | .  | .  |
| <i>Valeriana officinalis</i> L.                                                            | .  | .  | .  | . | .  | .  | P  | .  | P  | . | P  | .  | .  | .  | P  | . | D  | P  | P  | .  | .  |
| <i>Vanilla planifolia</i> Jacks. ex Andrews*                                               | .  | .  | .  | . | .  | .  | .  | A  | .  | . | .  | .  | .  | .  | .  | . | .  | .  | .  | A  | .  |
| <i>Vicia faba</i> L.*                                                                      | .  | CA | .  | . | CA | .  | CA | CA | CA | . | A  | .  | CA | CA | CA | . | CA | CA | CA | CA | .  |
| <i>Vicia lens</i> (L.) Coss. & Germ. subsp. <i>lens</i> * (= <i>Lens culinaris</i> Medik.) | .  | CA | .  | . | A  | .  | .  | .  | CA | . | .  | CA | CA | .  | .  | . | A  | A  | A  | CA | .  |
| <i>Vicia villosa</i> Roth                                                                  | .  | .  | .  | . | .  | .  | .  | .  | .  | . | .  | .  | .  | .  | .  | P | A  | .  | .  | .  | .  |
| <i>Vigna unguiculata</i> (L.) Walp.*                                                       | .  | .  | .  | . | .  | .  | .  | .  | .  | . | .  | .  | .  | .  | .  | . | .  | CA | .  | A  | .  |
| <i>Viola aethnensis</i> (DC.) Strobl subsp. <i>aethnensis</i>                              | .  | .  | .  | . | .  | .  | .  | .  | .  | . | .  | .  | .  | .  | .  | . | A  | .  | .  | .  | .  |
| <i>Vitis vinifera</i> L.*                                                                  | CA | P  | .  | . | CA | P  | P  | P  | P  | . | P  | .  | P  | P  | .  | P | P  | P  | P  | P  | .  |
| <i>Wisteria sinensis</i> (Sims) Sweet*                                                     | .  | .  | .  | . | .  | .  | .  | .  | CA | . | .  | .  | .  | .  | .  | . | .  | .  | A  | .  | .  |
| <i>Zea mays</i> L.*                                                                        | A  | A  | CA | . | CA | CA | A  | CA | CA | . | CA | .  | .  | .  | CA | . | CA | CA | .  | CA | .  |
| <i>Ziziphus jujuba</i> Mill.*                                                              | .  | .  | .  | . | P  | .  | .  | .  | P  | . | .  | .  | .  | CA | A  | P | CA | P  | CA | P  | .  |
