# Supplementary material for: Design a Database of Italian Vascular Alimurgic Flora (AlimurgITA): Preliminary Results
Source: MDPI journal article supplement (doi:10.3390/plants10040743), 2021-04-10
Supplement: s1 [file s1]

**Supplementary Materials Table S2.** List of the 358 selected texts (\*data not yet entered in the database).

| N. | Text                                                                                                                                                                                                                                              | Area                  |
|----|---------------------------------------------------------------------------------------------------------------------------------------------------------------------------------------------------------------------------------------------------|-----------------------|
| 1  | AA.VV., <i>Biodiversità coltivata nel Parco Nazionale Dolomiti Bellunesi</i> ; Parco Nazionale Dolomiti Bellunesi, Feltre (BL), Italy, 2006.                                                                                                      | Veneto                |
| 2  | Accogli, R.; Gambetta G.; Medagli P. <i>Erbe spontanee della Basilicata. Guida al riconoscimento e all'utilizzo delle piante alimentari tradizionali</i> ; Ed. Grifo (Cavallino), 2017; pp. 192.                                                  | Basilicata            |
| 3  | Accogli, R.; Marchiori, S. <i>Ricerche etnobotaniche nell'agro di Fasano</i> (Brindisi-Puglia). IV Convegno Nazionale "Piante Mediterranee. Le potenzialità del territorio e dell'Ambiente" Marina di Nova Siri (MT). 7–10 ottobre 2009; pp. 166. | Apulia                |
| 4  | Accogli, R.; Marrese M.; Medagli P. <i>Erbe spontanee della capitanata. Guida al riconoscimento e all'utilizzo delle piante alimentari tradizionali</i> . Ed. Grifo (Cavallino), 2017; pp. 192.                                                   | Apulia                |
| 5  | Accogli, R.; Medagli P. <i>Erbe spontanee della Calabria. Guida al riconoscimento e all'utilizzo delle piante alimentari tradizionali</i> ; Ed. Grifo (Cavallino), 2018; pp. 192.                                                                 | Calabria              |
| 6  | Accogli, R.; Medagli P. <i>Erbe spontanee salentine. Guida al riconoscimento e all'uso delle piante alimentari tradizionali</i> ; Ed. Grifo (Cavallino), 2014; pp. 208.                                                                           | Apulia                |
| 7  | Accogli, R.; Medagli, P.; Perrino, E.V. <i>Erbe spontanee in Terra di Bari. Guida al riconoscimento e all'utilizzo delle piante alimentari tradizionali</i> ; Ed. Grifo (Cavallino), 2015; pp. 192.                                               | Apulia                |
| 8  | Aleo, M.; Azzaro, D.; Cambria, S.; Bazan, G. Indagini etnobotaniche nel territorio di Paceco (Sicilia Occidentale). <i>Naturalista sicil.</i> <b>2020</b> , S. IV, XLIV (1-2), 169-208.                                                           | Sicily                |
| 9  | Aleo, M.; Cambria, S.; Bazan, G. Tradizioni etnofarmacobotaniche in alcune comunità rurali dei Monti di Trapani (Sicilia occidentale) <i>Quad. Bot. Amb. Appl.</i> <b>2013</b> , 24 , 27-48.                                                      | Sicily                |
| 10 | Aliotta, G. Edible Wild Plants in Italy. <i>Inform. Bot. Ital.</i> <b>1987</b> , 19 (1), 17–30.                                                                                                                                                   | Italy                 |
| 11 | Aliotta, G.; Salerno, C. <i>Le piante alimentari in Campania dalle origini al Duemila</i> EDIZIONI ATHENA * NAPOLI, 1995.                                                                                                                         | Campania              |
| 12 | Altobelli, A.; Braut, R.; Boriani, M. L'erbariol – Piante spontanee di usi alimentare nella Bisiacaria; Associazione Culturale Bisiaca, 2013; pp. 1-47.                                                                                           | Friuli Venezia Giulia |
| 13 | Ansaldi, M.; Tomei, P.E. Specie vegetali selvatiche e coltivate di uso medicinale nella tradizione popolare delle Apuane settentrionali. <i>Atti Soc. Tosc. di Sci. Nat. Mem. Serie B</i> , <b>1997</b> , 104, 19-34.                             | Tuscany               |
| 14 | Appi, E.; Appi, R.; Pagnucco, A.; Pagnucco, D. <i>Le piante nell'uso popolare in Friuli . Terapia e Cucina</i> ; Ed. Concordia Sette: Pordenone, Italy, 1979; pp. 120.                                                                            | Friuli Venezia Giulia |
| 15 | Arcidiacono S.; Pavone, P.; Salmeri, C. Specie spontanee usate per l'alimentazione umana nel territorio etneo (Sicilia Orientale). <i>Giornale Botanico Italiano</i> <b>1995</b> , 129(2), 149.                                                   | Sicily                |
| 16 | Arcidiacono, S. <i>Etnobotanica Etna - Le piante selvatiche e l'uomo</i> ; Ed. Danaus, 2016; pp. 150.                                                                                                                                             | Sicily                |
| 17 | Arcidiacono, S. Flora popolare nel territorio di Bronte (CT). In <i>Etnobotanica nella Provincia di Catania con Atti del Convegno "Andar per verdure"</i> ; Nuova Zangara Stampa Editrice: Linguaglossa, Italy, 2002.                             | Sicily                |
| 18 | Arcidiacono, S. <i>Le verdure spontanee dell'Etna Catania</i> . Azienda Provinciale del Turismo-Pro Loco Linguaglossa 1998.                                                                                                                       | Sicily                |
| 19 | Arcidiacono, S.; Costa, R.; Marletta, G.; Pavone, P.; Napoli, M. Usi popolari delle piante selvatiche nel territorio di Villarosa (EN – Sicilia Centrale) <i>Quad. Bot. Amb. Appl.</i> <b>2010</b> , 21 , 95-118.                                 | Sicily                |
| 20 | Arcidiacono, S.; Napoli M.; Oddo G.; Pavone P. Piante selvatiche d'uso popolare nei territori di Alcara li Fusi e Militello Rosmarino (Messina N-E Sicilia). <i>Quad. Bot. Amb. Appl.</i> <b>2007</b> , 18 , 105–146.                             | Sicily                |
| 21 | Arcidiacono, S.; Napoli, M.; Pavone, P. Piante spontanee d'uso popolare nel territorio di Bronte (Catania). <i>Quad. Bot. Amb. Appl.</i> <b>2003</b> , 14 , 151-172.                                                                              | Sicily                |
| 22 | Arcidiacono, S.; Pavone, P. Erbe spontanee commestibili del territorio etneo. <i>Boll. Acc. Gioenia Sci. Nat.</i> <b>1994</b> , 27 (346), 461-588.                                                                                                | Sicily                |
| 23 | Arcidiacono, S.; Pavone, P.; Salmeri, C. Erbe commestibili dell'Etna e loro valenza economica. Accademia della cucina, Conv. Intern. di Studi "Funghi, Tartufi e erbe mangerecce" L'Aquila 1995.                                                  | Sicily                |
| 24 | Arietti, N. <i>La flora economica e popolare del territorio Bresciano</i> ; Fratelli Geroldi ed., Brescia, Italy, 1974; pp. 186.                                                                                                                  | Lombardia             |

|    |                                                                                                                                                                                                                                                                                    |                |
|----|------------------------------------------------------------------------------------------------------------------------------------------------------------------------------------------------------------------------------------------------------------------------------------|----------------|
| 25 | Arietti, N. <i>La nostra flora nell'economia domestica. Note pratiche sulla utilizzazione dei vegetali spontanei nella Provincia di Brescia con particolare trattazione degli usi locali e delle denominazioni volgari bresciane e italiane</i> ; La Scuola: Brescia, Italy, 1941. | Lombardia      |
| 26 | Arrigoni, P.; Cerni, S.; Simeone, P.; Sarti, S. <i>Le buone erbe della campagna riminese</i> ; Editore: Provincia di Rimini - Assessorato Attività Produttive Servizio Agricoltura e Alimentazione II Edizione, 2002; pp. 205.                                                     | Emilia Romagna |
| 27 | Arrigoni, P.C.; Cerni S.; Piccari Ricci, S.; Sarti S. <i>Le buone erbe della campagna Riminese</i> ; Provincia di Rimini, Rimini, Italy, 1996; pp. 200.                                                                                                                            | Emilia Romagna |
| 28 | Atzei, A.D. <i>Le piante nella tradizione popolare della Sardegna</i> ; C. Delfino Editore: Sassari, Italy, 2003; pp. 596.                                                                                                                                                         | Sardinia       |
| 29 | Atzei, A.D.; Orioni, S.; Sotgiu, R. Contributo alla conoscenza degli usi etnobotanici nella Gallura (Sardegna). <i>Boll. Soc. Sarda Sci. Nat.</i> <b>1991</b> , 28 , 137-177.                                                                                                      | Sardinia       |
| 30 | Bagnoli, G.; di Soccio, C. <i>Molise in Verde; Non c'è erba volta in su che non abbia sua virtù</i> ; Esse Media editrice, 2005; pp. 66.                                                                                                                                           | Molise         |
| 31 | Bagnoni, V.; Ignéri, E.; Turini M. <i>Erbe di casa mia. Ricette del monte Pisano</i> ; Felici Ed. 2008; pp. 206.                                                                                                                                                                   | Tuscany        |
| 32 | Ballero, M.; Bruni, A.; Sacchetti, G.; Mossa, L.; Poli F. Indagine etnofarmacobotanica del territorio di Arzana (Sardegna orientale); <i>Ann. Bot.</i> <b>1994</b> , 52 , 489-500.                                                                                                 | Sardinia       |
| 33 | Barbagallo, C.; Furnari F. <i>Flora officinale del territorio di Caltagirone (Catania)</i> ; Ed. Succ. Fusi, Pavia, 1967.                                                                                                                                                          | Sicily         |
| 34 | Belcari, M.S. Una ricerca etnobotanica nel territorio di S. Maria a monte (Toscana): primo contributo Rivista di preistoria, etnografia, storia naturale. <i>Ist. Stor. Lucch.</i> <b>2012</b> , VII-X , 7-47.                                                                     | Tuscany        |
| 35 | Bellia, G.; Pieroni, A. Isolated, but transnational: the glocal nature of Waldensian ethnobotany, Western Alps, NW Italy. <i>Journal of ethnobiology and ethnomedicine</i> <b>2015</b> , 11 (1), 37.                                                                               | Piemonte       |
| 36 | Bellomaria, B. Le piante di uso popolare nel territorio di Camerino (Marche) <i>Arch. Bot. Biogeogr. Ital.</i> <b>1982</b> , 58 (3-4), 1-27.                                                                                                                                       | Marche         |
| 37 | Bellomaria, B.; Della Mora, L. Novità nell'uso delle piante officinali per la zona di Matelica (Macerata) anche in confronto con altre zone delle Marche <i>Arch. Bot. Biogeogr. Ital.</i> , <b>1985</b> , 61 (1-2), 51-81.                                                        | Marche         |
| 38 | Bellomaria, B.; Lattanzi, E. Le piante del territorio di Cupra Marittima (Marche) attualmente usate nella medicina popolare <i>Arch. Bot. e Biogeograf. Ital.</i> <b>1982</b> , 58 (3-4): 1-19.                                                                                    | Marche         |
| 39 | Benvenuti, R.; Covarelli, A.; Storai, R. <i>Le erbe officinali del territorio: curiosità e ricette di cucina della Comunità Montana Val di Bisenzio</i> ; Ed. Comunità Montana Val di Bisenzio, 1996.                                                                              | Tuscany        |
| 40 | Bernardo, L. <i>Fiori e piante del Parco del Pollino</i> ; Ed. Prometeo, Castrovillari, 2000.                                                                                                                                                                                      | Basilicata     |
| 41 | Bianchi, A.; Gallifuoco, G. Farmacopea Popolare del Gargano. <i>Natural</i> <b>2004</b> , 32 , 54-66.                                                                                                                                                                              | Apulia         |
| 42 | Bianco V.; Mariani R.; Santamaria P. Piante spontanee nella cucina tradizionale molese. Storie, curiosità e ricette; Bari, Ed. Levante 2009; pp. 276.                                                                                                                              | Apulia         |
| 43 | Bianco, V.V. Specie erbacee della flora infestante pugliese utilizzabili come ortaggi e piante da condimento. <i>Atti e relazioni dell'Accademia pugliese delle Scienze</i> . Fasano, Grafischena. 1989; 46 tomo II, 11-27.                                                        | Apulia         |
| 44 | Bianco, V.V. Specie erbacee spontanee eduli della flora pugliese. In Macchia Francesco (a cura di) <i>La flora e la vegetazione spontanea della Puglia nella scienza, nell'arte e nella storia: atti del Convegno</i> , Bari, 22-23 maggio 1993. Fasano: Schena, 1997; pp. 61-83.  | Apulia         |
| 45 | Bianco, V.V.; Macchackova M. Specie spontanee della flora italiana utilizzate come ortaggi e piante da condimento. in: Atti VI Giornate Scientifiche SOI, Spoleto, 23-25 Aprile 2002. Spoleto; pp. 435-436.                                                                        | Italy          |
| 46 | Biscotti, N. <i>Botanica delle erbe eduli . Peregrinazioni fitoalimurgiche . Dal Gargano alle Puglie</i> ; Ed. Centro Grafico Francescano, Foggia 2013; pp. 504.                                                                                                                   | Apulia         |
| 47 | Biscotti, N.; Bonsanto, D. <i>Vie erbose. Le erbe selvatiche nelle bioculture alimentari mediterranee</i> ; Editore: Centro Grafico 2020; pp. 560.                                                                                                                                 | Apulia         |
| 48 | Biscotti, N.; Bonsanto, D.; Del Viscio, G. The traditional food use of wild vegetables in Apulia (Italy) in the light of Italian ethnobotanical literature. <i>Italian Botanist</i> <b>2018</b> , 5 , 1-24.                                                                        | Apulia         |
| 49 | Biscotti, N.; Del Viscio, G.; Bonsanto D. Indagine etnobotanica sull'uso alimentare tradizionale di piante selvatiche in un comprensorio montano della Regione Puglia (Subappennino Dauno, Provincia Di Foggia) <i>Atti Soc. Tosc. Sci. Nat. Mem., Serie B</i> , 2018, 125, 17-29. | Apulia         |

|    |                                                                                                                                                                                                                                                                                                        |               |
|----|--------------------------------------------------------------------------------------------------------------------------------------------------------------------------------------------------------------------------------------------------------------------------------------------------------|---------------|
| 50 | Biscotti, N.; Pieroni, A. The hidden Mediterranean diet: Wild vegetables traditionally gathered and consumed in the Gargano area, Apulia, SE Italy. <i>Acta Soc. Bot. Poloniae</i> <b>2015</b> , 84 (3), 327–338.                                                                                      | Apulia        |
| 51 | Bisio, A.; Minuto, L. Il Preboggiun: leggenda e tradizione di una miscela di erbe selvatiche. In <i>Il Cibo e il Corpo: dal cibo alla cultura, dalla cultura al cibo</i> ; Ed. Erga: Genova, 1999; pp. 197-229.                                                                                        | Liguria       |
| 52 | Bisio, A.; Minuto, L. <i>The Prebuggiun</i> . In: Pieroni, A. (a cura di), <i>Erbi Boni, Erbi degli Stregghi</i> , Experiences Verlag, Colonia, 1998; pp. 34-46.                                                                                                                                       | Liguria       |
| 53 | Boari, F.; Cefola, M.; Di Gioia, F.; Pace, B.; Serio, F.; Cantore, V. Effect of cooking methods on antioxidant activity and nitrate content of selected wild Mediterranean plants <i>Int J Food Sci Nutr</i> 2013, 1–7.                                                                                | Mediterranean |
| 54 | Bonomo, R.; Trapani S. Piante officinali nelle Egadi (Favignana e Levanzo) <i>Lav. Ist. Bot. Giard. Col. Palermo</i> <b>1973</b> , 25 , 195-238.                                                                                                                                                       | Sicily        |
| 55 | Borgonovo, G.; Caimi, S.; Morini, G.; Scaglioni L.; Bassoli A. Taste active compounds in a traditional Italian food: 'lampascioni' <i>Chem. Biodivers.</i> <b>2008</b> , 5 , 1184–1194.                                                                                                                | Italy         |
| 56 | Bruni, A.; Ballero, M.; Poli F. Quantitative ethnopharmacological study of the Campidano Valley and Urzulei district, Sardinia, Italy <i>Journal of Ethnopharmacology</i> <b>1997</b> , 57 , 97-124.                                                                                                   | Apulia        |
| 57 | Bucci, A. <i>Gli erbi a Camaiore</i> ; 1999; pp. 27-32.                                                                                                                                                                                                                                                | Tuscany       |
| 58 | Calzolari, E. Le erbe spontanee nelle tradizioni gastronomiche del promontorio del Caprione (La Spezia). In <i>Erbi boni, erbi degli stregghi</i> ; Pieroni, A., Ed.; Experiences Verlag, Cologne, Germany, 1998; pp. 24-33.                                                                           | Liguria       |
| 59 | Camangi, F. <i>Erbe Selvatiche Alimentari delle Apuane e della Lunigiana</i> ; Ceccotti Ed., Massa, 1999.                                                                                                                                                                                              | Tuscany       |
| 60 | Camangi, F.; Bettini, D.; Cecchelli, G.; Santoro, A.; Stefani, A. Piante spontanee d'uso alimentare: viaggio alla scoperta della cucina povera a partire dalla tradizione popolare volterrana (Toscana); Atti 105° Congresso Nazionale S.B.I. Milano. 25-28/8/2010 2010; p. 108.                       | Tuscany       |
| 61 | Camangi, F.; Stefani A. <i>L'orto dei semplici nell'Eremo di Santa Caterina a Rio nell'Elba Frutta antica e piante spontanee nella tradizione alimentare elbana</i> ; Ed. ETS, 2014; pp. 270.                                                                                                          | Tuscany       |
| 62 | Camangi, F.; Stefani A.; Giambastiani M. Appunti fitoalimurgici: la "zuppa matta" di Piegai (Val Pedogna - Lucca - Toscana). <i>Atti dell'Istituto per la documentazione sul castagno e la ricerca forestale</i> <b>2005</b> , 85-98.                                                                  | Tuscany       |
| 63 | Camangi, F.; Stefani, A. Il castagno nella tradizione popolare. Provincia di Lucca e aree contermini. In: Le cultivar di castagno della provincia di Lucca - I parte. <i>Atti dell'Istituto per la documentazione sul castagno e la Ricerca Forestale (IRF)</i> <b>2011</b> , 2 , 61-64.               | Tuscany       |
| 64 | Camangi, F.; Stefani, A. Tradizioni Phytoalimurgiche in Toscana: Le piante selvatiche nella preparazione delle zuppe. <i>Riv. Preist., Etnogr. St. natur. Istituto Storico Lucchese</i> <b>2004</b> , 2 (1).                                                                                           | Tuscany       |
| 65 | Camangi, F.; Stefani, A.; Lippi, A. 100 Piante spontanee d'uso alimentare del territorio di Capannori; Ed. Biolabs, 2009; pp. 320.                                                                                                                                                                     | Tuscany       |
| 66 | Camangi, F.; Stefani, A.; Lippi, A.; Tomei, P.E. <i>Piante selvatiche di uso alimentare nella tradizione popolare della Garfagnana; erbe buone ed erbe cattive</i> . Ed. Studio d'Arte fotografica Comunita Montana della Garfagnana, 2007; pp. 94.                                                    | Tuscany       |
| 67 | Camangi, F.; Stefani, A.; Sebastiani, L. <i>Etnobotanica in val di Vara. L'uso delle piante nella tradizione popolare</i> ; Ed. S.l., Biolabs, 2009.                                                                                                                                                   | Liguria       |
| 68 | Camangi, F.; Stefani, A.; Sebastiano L. <i>Piante e folclore nelle Valli di Zeri in Lunigiana</i> ; Ed. ETS, 2013; pp. 224.                                                                                                                                                                            | Tuscany       |
| 69 | Camangi, F.; Stefani, A.; Tomei P.E. <i>Tradizioni etnobotaniche nelle foreste Casentinesi</i> ; Parco Nazionale Foreste Casentinesi, 2003.                                                                                                                                                            | Tuscany       |
| 70 | Camangi, F.; Stefani, A.; Tomei, P.E. Tradizioni etnofarmacobotaniche nei comuni di Poppi e Bibbiena (Arezzo - Toscana). <i>Atti Soc. Tosc. Sci. Nat., Mem.</i> <b>2003</b> , Serie B, 1-110.                                                                                                          | Tuscany       |
| 71 | Camangi, F.; Tomei, P.E. <i>Piante medicinali nella tradizione popolare del Capannorese</i> Ed. La Grafica Pisana, 1999; pp. 171.                                                                                                                                                                      | Tuscany       |
| 72 | Camangi, F.; Tomei, P.E. Tradizioni etno-farmacobotaniche nella provincia di Livorno: il territorio della Valle Benedetta <i>Inf. Bot. Ital.</i> 2003, 35 (1), 41-54.                                                                                                                                  | Tuscany       |
| 73 | Camangi, F.; Uncini Manganelli R.E. L'etnobotanica nel territorio di Capannori: Stato delle conoscenze e nuove acquisizioni. In Tomei P.E., Kugler P.C. (curatori) <i>Aspetti biologici del Territorio del Comune di Capannori</i> , "Studi Capannoresi", III, Comune di Capannori, 1999; pp. 177-224. | Tuscany       |

|     |                                                                                                                                                                                                                                                                                                    |                       |
|-----|----------------------------------------------------------------------------------------------------------------------------------------------------------------------------------------------------------------------------------------------------------------------------------------------------|-----------------------|
| 74  | Camangi, F.; Uncini Manganelli, R.E. Indagine etno-botanica nel pistoiese: il territorio di Collodi (PT). <i>Boll. Orto Bot. Lucca</i> <b>2004</b> , 3 (1), 19-39.                                                                                                                                 | Tuscany               |
| 75  | Camangi, F.; Uncini Manganelli, R.E. La cornucopia della natura: piante alimentari nella tradizione popolare del Monte Pisano. In <i>Monte Castellare – Valle delle Fonti: due aree protette dei Monti Pisani, aspetti naturalistici e storici</i> . Felici Editore: Pisa, Italy, 2000; pp. 45-52. | Tuscany               |
| 76  | Camangi, F.; Uncini Manganelli, R.E. <i>La scoperta delle piante medicinali nella tradizione popolare</i> ; Felici Ed. 2002; pp. 35-103.                                                                                                                                                           | Tuscany               |
| 77  | Camarda, I. Ricerche etnobotaniche nel Comune di Dorgali (Sardegna centro- occidentale). <i>Boll. Soc. Sarda Sci. Nat.</i> <b>1990</b> , 27, 147-204.                                                                                                                                              | Sardinia              |
| 78  | Camarda, I.; Carta, L.; Vacca, G.; Brunu, A. Les plantes alimentaires de la Sardaigne: un patrimoine ethnobotanique et culturel d'ancienne origine. <i>Fl. Medit.</i> <b>2017</b> , 27, 77-90.                                                                                                     | Sardinia              |
| 79  | Camarda, I.; Piras, G. Ethnobotanical knowledge in the agropastoral World of Putifigari village (Sardinia, Italy). <i>Delpinoa</i> <b>2003</b> , 45, 213-220.                                                                                                                                      | Sardinia              |
| 80  | Caneva, G.; Pontrandolfi, M.A.; Fascetti, S. <i>Le piante alimentari spontanee della Basilicata</i> ; Cons. Reg. Basilicata, Ufficio Stampa, 1997.                                                                                                                                                 | Basilicata            |
| 81  | Cappelletti, E.M.; Cirio, M. E.; Mutti, L. L'uso delle piante officinali nella medicina popolare del Feltrino (Belluno). <i>Atti Ist. Veneto Sci., Lett. Arti</i> <b>1979</b> , 137, 113-131.                                                                                                      | Veneto                |
| 82  | Cappelletti, E.M.; Trevisan, R.; Folletto, A.; Cattolica, P.M. Le piante utilizzate in medicina popolare in due vallate trentine: Val di Ledro e Val dei Mocheni <i>Studi Trentini Sci. Nat.</i> <b>1981</b> , 58, 119-140.                                                                        | Trentino Alto-Adige   |
| 83  | Casoria, P.; Menale, B.; Muoio, R. Muscari comosum, Liliaceae, in the food habits of South Italy. <i>Economic Botany</i> <b>1999</b> , 53, 113-117.                                                                                                                                                | Southern Italy        |
| 84  | Catanzaro, F. Piante officinali dell' isola di Pantelleria. <i>Fitoterapia</i> <b>1970</b> , 2, 66-83.                                                                                                                                                                                             | Sicily                |
| 85  | Catanzaro, F. Piante officinali dell' isola di Pantelleria. <i>Webbia</i> <b>1968</b> , 23, 135-148.                                                                                                                                                                                               | Sicily                |
| 86  | Certa, G. L'uso tradizionale delle piante nella comunità rurale di Chiusa Sclafani (Palermo). <i>Quad. Bot. Ambientale Appl.</i> <b>2020</b> , 31, 3-14.                                                                                                                                           | Sicily                |
| 87  | * Ceruti, A. <i>Piante medicinali e alimentari</i> ; Ed. Loescher, Torino, 1957.                                                                                                                                                                                                                   | Italy                 |
| 88  | Chiarungi, S.; Minuto, G. <i>Sette Buone Erbe Cellesche. Il Prebuggiun della Tradizione Comune di Celle Ligure</i> ; 2012; pp. 63.                                                                                                                                                                 | Liguria               |
| 89  | Chiavoni, M.; Raffo, E. S.; Tagliatalata, A. <i>Ricerca etnobotanica nella Provincia di Grosseto</i> . Tip. La Stampa: Grosseto, Italy, 1994.                                                                                                                                                      | Tuscany               |
| 90  | Chimenti Signorini, R.; Fumagalli, M. Indagine etnofarmacobotanica nella Valtournanche (Val d'Aosta). <i>Webbia</i> <b>1983</b> , 37, 69-94.                                                                                                                                                       | Aosta Valley          |
| 91  | Chiovenda-Bensi, C. Florula Medicinale delle Cinque Terre. <i>Webbia</i> , <b>1960</b> , 15, 631-641.                                                                                                                                                                                              | Liguria               |
| 92  | Chiovenda-Bensi, C. Piante medicinali nell'uso tradizionale della valle d'Ossola. <i>Atti Acc. Ligustica Sci. Lett. Genova</i> <b>1955</b> , 32-52.                                                                                                                                                | Piemonte              |
| 93  | Chiovenda-Bensi, C. Tradizioni e Usi fitoterapici popolari, la Valsesia. <i>Atti Acc. Ligustica Sci. Lett. Genova</i> <b>1957</b> , 13, 190-205.                                                                                                                                                   | Piemonte              |
| 94  | Clemente, P.; Giusti, M.E.; Di Pasquale, C. <i>Verso il Museo della Piana (Capannori – LU)</i> ; Progetto RUBIA ICA 3-2002-10055, 2005.                                                                                                                                                            | Tuscany               |
| 95  | Coassini Lokar, L.; Poldini, L. Herbal remedies in the traditional medicine of the Venezia Giulia region (North East Italy). <i>Journal of Ethnopharmacology</i> <b>1988</b> , 22, 231-278.                                                                                                        | Friuli Venezia Giulia |
| 96  | Coassini Lokar, L.; Poldini, L.; Angeloni Rossi, G. Appunti di etnobotanica del Friuli-Venezia Giulia. <i>Gortania</i> <b>1982</b> , 4, 101-151.                                                                                                                                                   | Friuli Venezia Giulia |
| 97  | Comin, S.; Pucciarelli, B. <i>Il mondo di Bepi Salon. Ricordi, ricette, erbe e funghi nella storia di un grande ristorante della Carnia</i> ; Camera di Commercio, Industria, Artigianato e Agricoltura di Udine, 2005; pp. 189.                                                                   | Friuli Venezia Giulia |
| 98  | Corbetta, F. <i>99 modeste, umili, saporosissime piante spontanee mangerecce</i> ; Edagricole: Bologna, Italy, 1991; pp. 181.                                                                                                                                                                      | Italy                 |
| 99  | Cornara, L. <i>Il finocchio di mare (Crithmum maritimum L.) Caratteristiche e usi di una alofita della riviera ligure</i> . I Quaderni della Massocca, Litografia Conti: La Spezia, Italy, 2007.                                                                                                   | Liguria               |
| 100 | Cornara, L.; La Rocca, A.; Girani, A.; Gardella, P. L. <i>Erbe e tradizioni del Golfo Paradiso [Herbs and traditions of the Golfo Paradiso]</i> . Ed. Araba Fenice, 2013; pp. 208.                                                                                                                 | Liguria               |
| 101 | Cornara, L.; La Rocca, A.; Marsili, S.; Mariotti, M.G. Traditional uses of plants in the Eastern Riviera (Liguria, Italy). <i>Journal of Ethnopharmacology</i> <b>2009</b> , 125, 16–30.                                                                                                           | Liguria               |

|       |                                                                                                                                                                                                                                                                                                                                                                                                                                                         |                       |
|-------|---------------------------------------------------------------------------------------------------------------------------------------------------------------------------------------------------------------------------------------------------------------------------------------------------------------------------------------------------------------------------------------------------------------------------------------------------------|-----------------------|
| 102   | Cornara, L.; La Rocca, A.; Terrizzano, L.; Dente, F.; Mariotti, M. G. Ethnobotanical and phytomedical knowledge in the North-Western Ligurian Alps. <i>Journal of Ethnopharmacology</i> <b>2014</b> , <i>155</i> , 463-484.                                                                                                                                                                                                                             | Liguria               |
| 103   | Cornara, L.; La Rocca, A.; Mariotti, M. <i>Andare per erbe. Piante e tradizioni della riviera spezzina</i> ; Eds Ligurpress, Genova, Italy, 2011; pp. 107.                                                                                                                                                                                                                                                                                              | Liguria               |
| 104   | Corsi, G.; Gaspari, G.; Pagni, A.M. L'uso delle piante nell'economia domestica della Versilia collinare e montana. <i>Atti Soc. Tosc. Sci. Nat., Mem.</i> <b>1980</b> , Serie B, <i>87</i> (1), 309-386.                                                                                                                                                                                                                                                | Tuscany               |
| 105   | Corsi, G.; Pagni, A.M. <i>Piante selvatiche di uso alimentare in Toscana</i> ; Pacini Eds.: Pisa, Italy, 1979.                                                                                                                                                                                                                                                                                                                                          | Tuscany               |
| 106   | Corsi, G.; Pagni, A.M. Studi sulla flora e vegetazione del Monte Pisano (Toscana Nord-Occidentale). V. Le piante spontanee nella alimentazione popolare <i>Atti Soc. Tosc. Sci. Nat., Mem.</i> <b>1979</b> , Serie B, <i>86</i> (5) 79-101.                                                                                                                                                                                                             | Tuscany               |
| 107 * | Costantini, G. <i>Litùn e Lidùn, erbucce primaverili mangerecce nella tradizione popolare friulana</i> . Rivista "Lares", Roma, 1941.                                                                                                                                                                                                                                                                                                                   | Friuli Venezia Giulia |
| 108   | Cucinotta, F.; Pieroni, A. 'If you want to get married, you have to collect virdura': the vanishing custom of gathering and cooking wild food plants on Vulcano, Aeolian Islands, Sicily <i>Food Cult.</i> <b>2018</b> Soc. 21, 539-567. doi: 10.1080/15528014.2018.1481263                                                                                                                                                                             | Sicily                |
| 109   | D'Africa, G. Relazione su una indagine erboristica condotta nell'Abruzzo-Molise. <i>EPPOS</i> <b>1963</b> , <i>8</i> , 379-387.                                                                                                                                                                                                                                                                                                                         | Abruzzi               |
| 110   | De Bellis, A. L'uso popolare delle erbe spontanee in Val d'Orcia. <i>Erboristeria Domani</i> <b>2008</b> , <i>3</i> , 60-65.                                                                                                                                                                                                                                                                                                                            | Tuscany               |
| 111   | De Feo, V.; Aquiro, R.; Menghini, A.; Ramundo, E.; Senatore, F. Traditional phytotherapy in the Peninsula Sorrentina, Campania, Southern Italy. <i>Journal of Ethnopharmacology</i> <b>1992</b> , <i>36</i> , 113-125.                                                                                                                                                                                                                                  | Campania              |
| 112   | De Feo, V.; Senatore F. Medicinal plants and phytotherapy in the Amalfitan Coast, Salerno Province, Campania, Southern Italy. <i>Journal of Ethnopharmacology</i> <b>1993</b> , <i>39</i> , 39-51.                                                                                                                                                                                                                                                      | Campania              |
| 113 * | De Martis Murrancia, F. <i>Le piante nella tradizione popolare sarda</i> ; EDISAR: Cagliari, Italy, 1992.                                                                                                                                                                                                                                                                                                                                               | Sardinia              |
| 114   | De Rosa, A.; Napolitano, B.; don Picariello, G. <i>Piante alimurgiche della Bassa Irpinia. Riconoscimento, diffusione ed utilizzazione gastronomica delle erbe selvatiche commestibili del Baianese e del Lauretano</i> . Youcanprint Self-Publishing, 2015; pp. 292.                                                                                                                                                                                   | Campania              |
| 115   | De Simoni, E.; Guarrera, P.M. Indagine etnobotaniche nella provincia di Teramo. <i>Quad. Bot. Amb. e Appl.</i> <b>1994</b> , <i>5</i> , 3-10.                                                                                                                                                                                                                                                                                                           | Abruzzi               |
| 116   | Della Monaca, G.; Roselli, D.; Tosi, G. La Botanica popolare del Monte Argentario. In <i>Geobotanica e Etnobotanica del Monte Argentario</i> ; Laurum Editore, 2001; pp. 123-245.                                                                                                                                                                                                                                                                       | Tuscany               |
| 117 * | Dell'Aquila, G.; Sicilia, S. <i>Flora spontanea a Cisternino</i> . Ed. Schena 2010; pp. 142.                                                                                                                                                                                                                                                                                                                                                            | Apulia                |
| 118   | Di Massimo, S; Di Massimo, M. <i>Ritorno alle Radici. Le piante spontanee per l'alimentazione e la salute</i> . Ed. Aboca, 2015; pp. 415.                                                                                                                                                                                                                                                                                                               | Italy                 |
| 119   | Di Novella, R.; Di Novella, N.; De Martino, L.; Mancini, E.; De Feo, V. Traditional plant use in the National Park of Cilento and Vallo di Diano, Campania, Southern Italy. <i>Journal of Ethnopharmacology</i> <b>2013</b> , <i>145</i> , 328-342.                                                                                                                                                                                                     | Campania              |
| 120   | Di Renzo, E. Alimentazione, salute, età in un contesto specifico di studio. Le pratiche fitoalimurgiche nel comprensorio di Oratino (CB). In Longo, E, Cedri, C, Giustini, M. (Eds.) <i>Invecchiare oggi: una sfida per il domani. Risultati del Progetto Europeo CHANGE (Care of Health Advertising New Goals for Elderly people)</i> . Istituto Superiore di Sanità. Roma, 3 dicembre 2010. Atti. Roma: Istituto Superiore di Sanità 2011; pp. 25-38. | Molise                |
| 121   | Di Tizio, A.; Łuczaj, Ł. J.; Quave, C. L.; Redžić, S.; Pieroni, A. Traditional food and herbal uses of wild plants in the ancient South-Slavic diaspora of Mundimitar/Montemitro (Southern Italy). <i>J. Ethnobiol. Ethnomed.</i> <b>2012</b> , <i>8</i> :21.                                                                                                                                                                                           | Molise                |
| 122   | Disciglio, G.; Tarantini, A.; Frabboni, L.; Gagliardi, A.; Giuliani, M.M.; Tarantino, E.; Gatta, G. Qualitative characterization of cultivated and wild edible plants: mineral elements, phenols content and antioxidant capacity. <i>Italian Journal of Agronomy</i> <b>2017</b> , <i>12</i> , 10-36.                                                                                                                                                  | Italy                 |
| 123   | Ditonno, N.; Lamusta, S. Saperi e aromi da piante e frutti spontanei della Puglia peninsulare. Ed. Amici della "A. De Leo": Brindisi, Italy, 1997; pp. 576.                                                                                                                                                                                                                                                                                             | Apulia                |
| 124   | Dreon A.L.; Paoletti M.G. The wild food (plants and insects) in Western Friuli local knowledge (Friuli-Venezia Giulia, North Eastern Italy). <i>Contributions to Natural History</i> <b>2009</b> , <i>12</i> (1), 461-488.                                                                                                                                                                                                                              | Friuli Venezia Giulia |

|     |                                                                                                                                                                                                                                                                                                                                                                                                                                                                                                                                                                                          |                         |
|-----|------------------------------------------------------------------------------------------------------------------------------------------------------------------------------------------------------------------------------------------------------------------------------------------------------------------------------------------------------------------------------------------------------------------------------------------------------------------------------------------------------------------------------------------------------------------------------------------|-------------------------|
| 125 | Egea Molinas, M.T. Etnobotanica nell'Alta Valle del Reno (Toscana ed Emilia-Romagna, Italia). PhD Thesis, Universidad Miguel Hernández de Elche, Orihuela, 22 february 2016, pp. 524.                                                                                                                                                                                                                                                                                                                                                                                                    | Emilia-Romagna, Tuscany |
| 126 | Fagioli, L.; Marini, D. Pianta alimentari ed officinali di Forni di Sopra nel Parco Naturale delle Dolomiti Friulane. Ed. Parco Naturale Dolomiti Friulane, 2006; pp. 85.                                                                                                                                                                                                                                                                                                                                                                                                                | Friuli Venezia Giulia   |
| 127 | Fenaroli, L. Florae Garganicae Mantissa <i>Delpinoa</i> <b>1972-1973</b> , n.s., 14-15.                                                                                                                                                                                                                                                                                                                                                                                                                                                                                                  | Apulia                  |
| 128 | Ficarra, P.; Scaccabarozzi S. Buoni da mangiare. Erbe e frutti selvatici delle vallate dei Nebrodi; 2011; pp. 293 <a href="http://piantespontaneeincucina.info/wordpress/?page_it=58">http://piantespontaneeincucina.info/wordpress/?page_it=58</a> .                                                                                                                                                                                                                                                                                                                                    | Sicily                  |
| 129 | Fioretti, E. <i>L'arca delle verdure (Progetto n° 4). Relazione dettagliata sull'attività svolta e sui risultati ottenuti nel terzo anno di attuazione del progetto e relazione finale</i> Dipartimento di Biologia MCA, Università di Camerino 2010.                                                                                                                                                                                                                                                                                                                                    | Marche                  |
| 130 | Fossati, F.; Bianchi, A.; Favali, M. A. Farmacopea popolare del Parmense: passato e presente. <i>Inf. Bot. Ital.</i> <b>1999</b> , 31 (1-3), 171-176.                                                                                                                                                                                                                                                                                                                                                                                                                                    | Emilia Romagna          |
| 131 | Galt, A.H.; Galt, J.W.; Peasant use of some wild plants on the Island of Pantelleria, Sicilia. <i>Economic Botany</i> <b>1978</b> , 32 , 20-26.                                                                                                                                                                                                                                                                                                                                                                                                                                          | Sicily                  |
| 132 | Gargano, M.L.; Venturella, G.; Lazzara, S.; Lo Nardo, R.; Saporita, P. Ethnobotanical knowledge in some rural communities of northern Sicily (Palermo, Italy). <i>Atti Soc.Tosc. Sci. Nat., Mem.</i> <b>2018</b> , Serie B, 125 , 31-40.                                                                                                                                                                                                                                                                                                                                                 | Sicily                  |
| 133 | Gastaldo, P.; Barberis, G.; Fossati, F. Le piante della medicina tradizionale nei dintorni di Praglia (Appennino Ligure-Piemontese). <i>Atti Acc. Lig. Sci. Lett. (Genova)</i> <b>1978</b> , 35, 1-35.                                                                                                                                                                                                                                                                                                                                                                                   | Liguria                 |
| 134 | Geraci, A.; Amato, F.; Di Noto, G.; Bazan, G.; Schicchi, R. The wild taxa utilized as vegetables in Sicily (Italy): a traditional component of the Mediterranean diet. <i>J. Ethnobiol. Ethnomed.</i> <b>2018</b> , 14 :14.                                                                                                                                                                                                                                                                                                                                                              | Sicily                  |
| 135 | Ghirardini, M.P.; Carli, M.; del Vecchio, N.; Rovati, A.; Cova, O.; Valigi, F.; Agnetti, G.; Macconi, M.; Adamo, D.; Traina, M.; Laudini, F.; Marcheselli, I.; Caruso, N.; Gedda, T.; Donati, F.; Marzadro, A.; Russi, P.; Spaggiari, C.; Bianco, M.; Binda, R.; Barattieri, E.; Tognacci, A.; Girardo, M.; Vaschetti, L.; Caprino, P.; Sesti, E.; Andreozzi, G.; Coletto, E.; Belzer, G.; Pieroni, A. The importance of a taste a comparative study on wild food plant consumption in twenty-one local communities in Italy. <i>J. Ethnobiol. Ethnomed.</i> <b>2007</b> , 3 (22), 1-14. | Italy                   |
| 136 | Giachetti, G.; Tomei P. E. Pianta officinali nell'uso tradizionale del territorio mugellano (Toscana). <i>Atti Soc. It. Sci. nat. Museo civ. Stor. nat. Milano</i> <b>2003</b> , 144 (1), 23-49.                                                                                                                                                                                                                                                                                                                                                                                         | Tuscany                 |
| 137 | Giannotti, G. <i>Piante spontanee commestibili Comunità Montana Cigno Valle Biferno Casacalenda (CB)</i> ; 2008; pp. 76.                                                                                                                                                                                                                                                                                                                                                                                                                                                                 | Molise                  |
| 138 | * Giardino Botanico Lorenzo Rota di Bergamo. <i>Le nostre erbe: piante alimentari spontanee</i> ; Ed. Junior: Bergamo, Italy, 1996; pp. 120.                                                                                                                                                                                                                                                                                                                                                                                                                                             | Lombardia               |
| 139 | Giusti, M.E.; Nebel, S.; Pieroni, A. Erbe e percezione del sapore tra gli Arbëreshë del Vulture in Lucania. <i>La Ricerca Folklorica</i> <b>2002</b> , 45 , 29-41.                                                                                                                                                                                                                                                                                                                                                                                                                       | Basilicata              |
| 140 | Giusti, M.E.; Pieroni, A. Cercare, raccogliere ed utilizzare piante spontanee (e non). Alcune indagini etnoscientifiche in Provincia di Lucca. <i>Boll. Acc. Euteleti della Città di San Miniato (Italy)</i> <b>2009</b> , 76, 429-460.                                                                                                                                                                                                                                                                                                                                                  | Tuscany                 |
| 141 | Guarino, C.; De Simone, L.; Santoro, S. Ethnobotanical Study of the Sannio Area, Campania, Southern Italy. <i>Ethnobotany Research Applications</i> <b>2008</b> , 6, 255-317.                                                                                                                                                                                                                                                                                                                                                                                                            | Campania                |
| 142 | Guarrera, P.M. Food Medicine and Minor Nourishment in the Folk Traditions of Central Italy (Marche, Abruzzo and Latium). <i>Fitoterapia</i> <b>2003</b> , 74 (6), 515-544.                                                                                                                                                                                                                                                                                                                                                                                                               | Marche, Abruzzi, Latium |
| 143 | Guarrera, P.M. Il patrimonio etnobotanico del Lazio. Le piante del Lazio nell'uso terapeutico, alimentare, domestico, religioso e magico; Regione Lazio, Assessorato alla Cultura e Dipartimento di Biologia Vegetale Università "La Sapienza", Tip. Tipar: Roma, Italy, <b>1994</b> .                                                                                                                                                                                                                                                                                                   | Latium                  |
| 144 | Guarrera, P.M. Le piante nelle tradizioni popolari del Lazio. <i>Erboristeria Domani</i> <b>2004</b> , 75-84.                                                                                                                                                                                                                                                                                                                                                                                                                                                                            | Latium                  |
| 145 | Guarrera, P.M. Le piante nelle tradizioni popolari del Molise. <i>Erboristeria Domani</i> <b>2009</b> , 335, 58-64.                                                                                                                                                                                                                                                                                                                                                                                                                                                                      | Molise                  |
| 146 | Guarrera, P.M. Le piante nelle tradizioni popolari dell'Emilia-Romagna. <i>Erboristeria Domani</i> <b>2008</b> , 329, 58-69.                                                                                                                                                                                                                                                                                                                                                                                                                                                             | Emilia Romagna          |
| 147 | Guarrera, P.M. Le piante nelle tradizioni popolari della Basilicata. <i>Erboristeria Domani</i> <b>2005</b> , 56-63.                                                                                                                                                                                                                                                                                                                                                                                                                                                                     | Basilicata              |
| 148 | Guarrera, P.M. Le piante nelle tradizioni popolari della Liguria. <i>Erboristeria Domani</i> <b>2008</b> , 319 , 61-67.                                                                                                                                                                                                                                                                                                                                                                                                                                                                  | Liguria                 |

- 149 Guarrera, P.M. Le piante nelle tradizioni popolari della Lombardia. *Erboristeria Domani* **2008**, 30 , 60–69. Lombardia
- 150 Guarrera, P.M. Le piante nelle tradizioni popolari dell'Abruzzo. *Erboristeria Domani* **2004**, 53-60. Abruzzi
- 151 Guarrera, P.M. Le piante nelle tradizioni popolari delle Marche. *Erboristeria Domani* **2005**, 52-59. Marche
- 152 Guarrera, P.M. Primo contributo allo studio del patrimonio etnobotanico del Molise Atti del 97° Congresso della Società Botanica Italiana, Lecce, 24-27 settembre 2002, p. 209. Molise
- 153 Guarrera, P.M. Ricerche etnobotaniche nelle province di Macerata e di Ancona. *EPPOS* **1981**, 63 (2), 99–108, 63 (4), 220–228. Marche
- 154 Guarrera, P.M. Usi e Tradizioni della Flora Italiana. Medicina, Popolare ed Etnobotanica. Ed. Aracne: Roma, Italy, 2006; pp. 436. Italy
- 155 Guarrera, P.M. Usi Tradizionali delle piante in alcune aree marchigiane. *Inf. Bot. Ital.* **1990**, 22 (3), 155-167. Marche
- 156 Guarrera, P.M. *Usi tradizionali delle piante nel territorio della Majella. Rivista Abruzzese, Fascic. Monograf. su Erbe e Piante Medicinali nella Storia e nelle Tradizioni Popolari Abruzzesi*; Centro Servizi Culturali Regione Abruzzo, Off. Grafiche Anxanum, Lanciano, Italy, 1987; pp. 17-44. Abruzzi
- 157 Guarrera, P.M.; Castellacci, A.M.; Tacconi, M. Gli usi tradizionali delle piante (nella zona dei Castelli romani). *Agricoltura Ambiente* **1984**, 24, 46-64. Latium
- 158 Guarrera, P.M.; Forti, G.; Marignoli, S. Ethnobotanical and ethnomedicinal uses of plants in the district of Acquapendente (Latium, Central Italy) *J. Ethnopharmacol.* **2005**, 96 , 429-444. Latium
- 159 Guarrera, P.M.; Forti, G.; Marignoli, S.; Gelsomini, G. Piante e tradizione popolare ad Acquapendente. *Quaderni del Museo del Fiore n.2.* Comune di Acquapendente, regione Lazio. Acquapendente, 2004. Latium
- 160 Guarrera, P.M.; Leporatti, M. Ethnobotanical remarks on Central and Southern Italy. *J. Ethnobiol. Ethnomed.* **2007**, 3 , 23-33. Central and Southern Italy
- 161 Guarrera, P.M.; Lucchese, F.; Medori, S. Ethnophytotherapeutical research in the high Molise region (Central-Southern Italy). *J. Ethnobiol. Ethnomed.* **2008**, 4 (1), 1-11. Molise
- 162 Guarrera, P.M.; Lucchese, F.; Medori, S. *L'uso tradizionale delle piante nell'Alto Molise.* Ed. Tipar arti Grafiche: Firenze, Italy, 2009; pp. 127. Molise
- 163 Guarrera, P.M.; Manzi A. Wild plants of organoleptic or nutritional interest and food traditions in central Italy: some interesting cases. *Plant Genet. Resour.* **2005**, 3 (3), 322–325. Central Italy
- 164 Guarrera, P.M.; Nicoletti, M. I nutraceutici, o alimenti-medicina, e la tradizione popolare. In *Etnobotanica. Conservazione di un patrimonio culturale come risorsa per uno sviluppo sostenibile*; Caneva, G., Pieroni, A., Guarrera, P.M., Eds.; Edipuglia: Santo Spirito (Ba), Italy, 2013; pp. 289–293. Italy
- 165 Guarrera, P.M.; Salerno, G.; Caneva, G. Food, flavouring and feed plant traditions in the Tyrrhenian sector of Basilicata, Italy. *J. Ethnobiol. Ethnomed.* **2006**, 2 (1), 1-6. Basilicata
- 166 Guarrera, P.M.; Salerno, G.; Caneva, G. Indagini etnobotaniche nel versante tirrenico della Basilicata. Atti del 98° Congresso della Società Botanica Italiana, Catania, 24-26 settembre 2003, p. 138. Basilicata
- 167 Guarrera, P.M.; Salerno, G.; Caneva, G. Le tradizioni etno-e farmacobotaniche del territorio di Maratea. In *Flora, vegetazione e tradizioni etnobotaniche di Maratea*; Cutini, M., Caneva, G., Eds.; Gangemi Ed.: Rome, Italy, 2009; pp. 141–168. Basilicata
- 168 Guarrera, P.M.; Savo, V. Perceived health properties of wild and cultivated food plants in local and popular traditions of Italy: a review. *J. Ethnopharmacol.* **2013**, 146 (3), 659–680. Italy
- 169 Guarrera, P.M.; Savo, V. Wild food plants used in traditional vegetable mixtures in Italy. *J. Ethnopharmacology* **2016**, 185 , 202–234. Italy
- 170 Guarrera, P.M.; Tammaro, F. Piante amaro-aromatiche utilizzate nell'alimentazione ed in liquoristica in Abruzzo e in altre zone d'Italia. Atti del Convegno Internazionale "Funghi, tartufi ed erbe mangerecce". L'Aquila, 28 settembre-1 ottobre 1995; pp.105–119. Abruzzi
- 171 Guerci, A. La ricerca e la didattica etnobotanica in Italia: stato attuale e prospettive. *Inf. Bot. Ital.* **1999**, 31 (1-3), 99 -102. Italy

|     |                                                                                                                                                                                                                                                                                                                                                                                                                                                                                     |                          |
|-----|-------------------------------------------------------------------------------------------------------------------------------------------------------------------------------------------------------------------------------------------------------------------------------------------------------------------------------------------------------------------------------------------------------------------------------------------------------------------------------------|--------------------------|
| 172 | Hadjichambis, A.C.; Paraskeva-Hadjichambi, D.; Della, A.; Giusti, M.E.; De Pasquale, C.; Lenzarini, C.; Censorii, E.; Gonzales-Tejero, M. R.; Sanchez-Rojas, C. P.; Ramiro-Gutierrez, J. M.; Skoula, M.; Johnson, C.; Sarpaki, A.; Hmamouchi, M.; Jorhi, S.; El-Demerdash, M.; El-Zayat, M.; Pieroni, A. Wild and semidomesticated food plant consumption in seven circum-Mediterranean areas. <i>Int. Journal of Food Sciences and Nutrition</i> <b>2008</b> , <i>59</i> , 383-414 | Mediterranean            |
| 173 | Hammer, K.; Laghetti, G.; Cifarelli, S.; Spahillari, M.; Perrino, P. Pimpinella anisoides Briganti. <i>Genetic Resources and Crop Evolution</i> <b>2000</b> , <i>47</i> , 223-225.                                                                                                                                                                                                                                                                                                  | Basilicata               |
| 174 | Idolo, M.; Motti, R.; Mazzoleni, S. Ethnobotanical and phytomedicinal knowledge in a long-history protected area, the Abruzzo, Lazio and Molise National Park (Italian Apennines). <i>J. Ethnopharmacol.</i> <b>2010</b> , <i>127</i> , 379-395.                                                                                                                                                                                                                                    | Abruzzi                  |
| 175 | Juliano, L.; Grotteria, M.; Pascoli, D.; Rispoli, P.; Sigilli, A.; Sirianni, R.M. <i>Le piante della tradizione calabrese</i> ; ARSSA Calabria, 2002; pp.125. <a href="http://www.arsacweb.it/wpcontent/uploads/2017/07/Le-piante-della-tradizione-Calabrese_ARSAC_1.pdf">http://www.arsacweb.it/wpcontent/uploads/2017/07/Le-piante-della-tradizione-Calabrese_ARSAC_1.pdf</a>                                                                                                     | Calabria                 |
| 176 | La Rocca, A.; Cornara, L.; Mariotti, M.G. Fitoalimurgia nella riviera ligure di levante. Atti 103° Congresso S.B.I., Reggio Calabria. 17-19.9.2008, p. 146.                                                                                                                                                                                                                                                                                                                         | Liguria                  |
| 177 | La Rocca, A.; Mariotti, M.G.; Cornara, L. Piante spontanee di interesse alimentare in Liguria. Atti 105° Congresso Nazionale S.B.I., Univ. di Milano. 25-28/8/2010, 2010; p. 109.                                                                                                                                                                                                                                                                                                   | Liguria                  |
| 178 | La Rocca, A.; Cornara, L.; Mariotti, M.G.; Terrizzano, L. <i>Piante e tradizioni a Cosio d'Arroscia Boves</i> (CN); Ed. Araba Fenice, 2012; pp. 160.                                                                                                                                                                                                                                                                                                                                | Liguria                  |
| 179 | Laghetti, G.; Pignone, D.; De Lisi, A.; Cifarelli, S.; Faslia, N.; Hammer, K. Collecting crop genetic resources in Italian towns of Albanian origin across the Molise, Calabria and Sicily regions. <i>Genetic Resources and Crop Evolution</i> <b>2011</b> , <i>58</i> (1), 139-152.                                                                                                                                                                                               | Molise, Calabria, Sicily |
| 180 | Lancioni, M.C.; Ballero, M.; Mura, L.; Maxia, A. Usi alimentari e terapeutici nella tradizione popolare del Goceano (Sardegna centrale). <i>Atti Soc. tosc. Sci. nat., Mem.</i> <b>2007</b> , Serie B, <i>114</i> , 45-56.                                                                                                                                                                                                                                                          | Sardinia                 |
| 181 | Lanzan, L.A. La medicina popolare della Valsesia. In <i>Herbora</i> , Atti delle giornate 23-28 maggio 1979; pp. 338-341.                                                                                                                                                                                                                                                                                                                                                           | Piemonte                 |
| 182 | Lentini, F. Gli usi tradizionali delle piante di Sant'Angelo Muxaro. In Atti del Convegno "Natura, Mito & Storia nel Regno Sicano di Kokalos" Sant'Angelo Muxaro (Agrigento) <b>1996</b> , 33-39.                                                                                                                                                                                                                                                                                   | Sicily                   |
| 183 | Lentini, F. Indagini etnobotaniche in Sicilia. II. L'uso tradizionale delle piante in alcune comunità del Trapanese. Atti del Convegno "Ricerca Sperimentale in Farmacobotanica" (Urbino, 25-26 Settembre 1987), "Studi Urbinati" <b>1987</b> , <i>LX</i> , s. C, <i>29</i> , 151-167.                                                                                                                                                                                              | Sicily                   |
| 184 | Lentini, F. L'etnobotanica in Sicilia: le piante alimentari di uso popolare. In <i>Etnobotanica nella Provincia di Catania con Atti del Convegno "Andar per verdure"</i> ; Nuova Zangara Stampa Editrice: Linguaglossa, Italy, 2002.                                                                                                                                                                                                                                                | Sicily                   |
| 185 | Lentini, F. The role of ethnobotanics in scientific research. State of ethnobotanical knowledge in Sicily. <i>Fitoterapia</i> <b>2000</b> , <i>71</i> , 83-88.                                                                                                                                                                                                                                                                                                                      | Sicily                   |
| 186 | Lentini, F.; Aleo, M.; Amenta, R. L'uso popolare delle piante nelle isole Egadi (Sicilia). <i>Acta Phytoterapeutica</i> <b>1997</b> , <i>4</i> (2): 88-94.                                                                                                                                                                                                                                                                                                                          | Sicily                   |
| 187 | Lentini, F.; Aleo, M.; Amenta, R. L'uso popolare delle piante nelle isole Egadi (Sicilia). <i>Giorn. Bot. Ital.</i> <b>1993</b> , <i>127</i> (3), 702.                                                                                                                                                                                                                                                                                                                              | Sicily                   |
| 188 | Lentini, F.; Amenta R. Indagini sull'uso tradizionale delle piante della flora locale nelle comunità dell'Agrigentino. <i>Giorn. Bot. Ital.</i> <b>1992</b> , <i>126</i> (2): 371.                                                                                                                                                                                                                                                                                                  | Sicily                   |
| 189 | Lentini, F.; Catanzaro, F.; Aleo, M. Indagine etnobotaniche in Sicilia. III. L'uso tradizionale delle piante nel territorio di Mazzara del Vallo (Trapani). <i>Atti dell'Accademia di Scienze Lettere e Arti di Palermo</i> <b>1988</b> , 1-29.                                                                                                                                                                                                                                     | Sicily                   |
| 190 | Lentini, F.; Di Martino, A.; Amenta, R. Contributo alla conoscenza della flora popolare dell'isola di Ustica. <i>Quad. Bot. Amb. Appl. Palermo</i> <b>1994</b> , <i>5</i> , 47-54.                                                                                                                                                                                                                                                                                                  | Sicily                   |
| 191 | Lentini, F.; Di Martino, A.; Amenta, R. La flora popolare di Ustica (Palermo). <i>Giorn. Bot. Ital.</i> <b>1996</b> , <i>129</i> (2), 167.                                                                                                                                                                                                                                                                                                                                          | Sicily                   |
| 192 | Lentini, F.; Giani, S.; Amenta, R. L'uso popolare delle piante nelle isole Eolie (Sicilia). <i>Acta technologiae et legis medicamenti. Pharmacia mediterranea</i> <b>1995</b> , <i>6</i> (3): 351-355.                                                                                                                                                                                                                                                                              | Sicily                   |
| 193 | Lentini, F.; Raimondo, F. M. Indagini etnobotaniche in Sicilia. IV. L'uso tradizionale delle piante nel territorio di Mistretta (Messina). <i>Quad. Bot. Amb. Appl.</i> <b>1990</b> , <i>1</i> , 103-117.                                                                                                                                                                                                                                                                           | Sicily                   |



|       |                                                                                                                                                                                                                                                                                                    |                      |
|-------|----------------------------------------------------------------------------------------------------------------------------------------------------------------------------------------------------------------------------------------------------------------------------------------------------|----------------------|
| 194   | Lentini, F.; Venturella, G.; Raimondo, F. M. Sintesi delle indagini etnobotaniche condotte in Sicilia. <i>Giorn. Bot. Ital.</i> <b>1988</b> , 122 (1), 221.                                                                                                                                        | Sicily               |
| 195   | Lentini, F.; Venza F. Valorizzazione delle piante selvatiche di uso alimentare in Sicilia. Atti 2° Convegno Nazionale Pianta Mediterranee, Agrigento, 8.10.2004.                                                                                                                                   | Sicily               |
| 196   | Lentini, F.; Venza, F. Wild food plants of popular use in Sicily. <i>J. Ethnobiol. Ethnomed.</i> <b>2007</b> , 3 (1), 15.                                                                                                                                                                          | Sicily               |
| 197   | Lentini, F.; Aleo, M. Indagini etnobotaniche in Sicilia. V. L'uso tradizionale delle piante nel territorio di Erice (Trapani). <i>Atti Accad. Sci. Lett. Arti Palermo</i> <b>1991</b> , XI, 67-98.                                                                                                 | Sicily               |
| 198 * | Lentini, F.; Di Martino, A.; Amenta, R. La flora popolare dell'Isola di Pantelleria (TP). In VIII Convegno S.I.F. "Alla scoperta della Digitale del Gennargentu", Arzana (Nuoro), 1996, 70.                                                                                                        | Sicily               |
| 199   | Lentini, F.; Di Martino, A.; Amenta, R. Le piante di uso popolare nell'arcipelago delle Pelagie (AG). <i>L'uomo e l'ambiente</i> <b>1995</b> , 19, 117-121.                                                                                                                                        | Sicily               |
| 200   | Leonti, M.; Nebel, S.; Rivera, D.; Heinrich, M. Wild gathered food plants in the European Mediterranean: A comparative analysis. <i>Economic Botany</i> <b>2006</b> , 60 (2), 130-142.                                                                                                             | Basilicata, Calabria |
| 201   | Leporatti, M. L.; Guarrera, P. M. Contributo alla conoscenza degli usi tradizionali delle piante in Capitanata e Salento (Puglia). Atti del 99° Congresso della Società Botanica italiana, Torino, 22-24 settembre 2004, pp. 285.                                                                  | Apulia               |
| 202   | Leporatti, M.L.; Corradi, L. Ethnopharmacobotanical remarks on the Province of Chieti town (Abruzzo, Central Italy). <i>J. Ethnopharmacol.</i> <b>2001</b> , 74, 17-40.                                                                                                                            | Abruzzi              |
| 203   | Leporatti, M.L.; Guarrera, P.M. Ethnobotanical remarks in Capitanata and Salento areas (Puglia, Southern Italy). <i>Etnobiology</i> <b>2007</b> , 5, 51-64.                                                                                                                                        | Apulia               |
| 204   | Leto, C.; Tuttolomondo, T.; La Bella, S.; Bonsanguea G.; Venturella G.; Gargano, M.L.; Savo, V.; Licata, M. Ethnobotanical investigation on wild plants in the Monti Sicani Regional Park (Sicily, Italy). <i>Journal of Ethnopharmacology</i> , <b>2014</b> , 153 (3), 568-586.                   | Sicily               |
| 205   | Licata, M.; Tuttolomondo, T.; Leto, C.; Virga, G.; Bonsangue, G.; Cammalleri, I.; Gennaro, M.C.; La Bella, S. A survey of wild plant species for food use in Sicily (Italy) – results of a 3-year study in four Regional Parks. <i>J. Ethnobiol. Ethnomed.</i> <b>2016</b> , 12 :12.               | Sicily               |
| 206   | Lippi, A. <i>Da erbe per i poveri a cibo per i buongustai: la riscoperta delle piante selvatiche di uso alimentare</i> . Ed. Ponte, Lucca, Italy, 1998; pp. 31.                                                                                                                                    | Tuscany              |
| 207   | Lippi, S. L'uso delle piante nella tradizione popolare del territorio comunale di Massarosa (LU) (Botrici, Camisano, Casesi, Mommio Castello, I Venti). <i>Paralleli e Meridiani</i> <b>2005</b> , Anno III, N. 1, 7-44.                                                                           | Tuscany              |
| 208   | Lomagno Caramiello, R.; Piervittori, A.; Lomagno, P.A.; Rolando C. Fitoterapia popolare nelle Valli Chisone e Germanasca. <i>Ann. Fac. Sci. Agr. Univ. Torino</i> <b>1984</b> , XIII, 259-298.                                                                                                     | Piemonte             |
| 209   | Lomagno, P.; Lomagno Caramiello, R. La fitoterapia popolare nella valle di Susa. <i>Allionia</i> <b>1970</b> , 16, 165-174.                                                                                                                                                                        | Piemonte             |
| 210   | Longhi, M.; Scanavino, C. Alpi occidentali. Una ricerca sulle tradizioni erboristiche. <i>Erboristeria domani</i> <b>1986</b> , 11, 54-58.                                                                                                                                                         | Piemonte             |
| 211   | Lucchetti, L.; Zitti, S.; Taffetani, F. Ethnobotanical uses in the Ancona district (Marche region, Central Italy). <i>J. Ethnobiol. Ethnomed.</i> <b>2019</b> , 15 (1), 1-33.                                                                                                                      | Marche               |
| 212   | Lupia, A.; Lupia, C.; Lupia R. <i>Etnobotanica in Calabria. Viaggio alla scoperta di antichi saperi intorno al mondo delle piante</i> . Ed. Rubbettino: Soveria Mannelli (CZ), Italy, 2017; pp. 341.                                                                                               | Calabria             |
| 213   | Lupia, C. <i>Etnobotanica. Le piante e i frutti spontanei nella Sila catanzarese</i> . Ed. Abramo, Catanzaro, Italy, 2004; pp. 99.                                                                                                                                                                 | Calabria             |
| 214   | Lupia, C.; Lupia, R. <i>Etnobotanica: piante e tradizioni popolari di Calabria</i> . Congi: Crotone, Italy, 2014.                                                                                                                                                                                  | Calabria             |
| 215   | Macchi, M. P. Schede etnobotaniche delle piante alimurgiche dell'Alto Garda 2017 <a href="https://www.judicaria.it/wp-content/uploads/2019/04/schede-piante-alimurgiche-Alto-Garda-2017.pdf">https://www.judicaria.it/wp-content/uploads/2019/04/schede-piante-alimurgiche-Alto-Garda-2017.pdf</a> | Trentino Alto-Adige  |
| 216   | Maccioni, S.; Flamini, G.; Cioni, P.L.; Bedini, G.; Guazzi, E. Ricerche etnobotaniche in Liguria. La riviera spezzina (Liguria orientale). <i>Atti Soc. tosc. Sci. nat., Mem.</i> <b>2008</b> , Serie B, 115, 77-82.                                                                               | Liguria              |
| 217   | Maccioni, S.; Monti, G.; Flamini, G.; Cioni, P.L.; Morelli, I.; Guazzi, E. Ricerche etnobotaniche in Liguria. La Val Lerrone e la bassa Valle Arroscia. <i>Atti Soc. tosc. Sci. Nat. Mem.</i> <b>2005</b> , Serie B, 111 (2004), 129-134.                                                          | Liguria              |

|     |                                                                                                                                                                                                                                                                                            |                               |
|-----|--------------------------------------------------------------------------------------------------------------------------------------------------------------------------------------------------------------------------------------------------------------------------------------------|-------------------------------|
| 218 | Maccioni, S.; Tomei, P. E.; Rizzo, A. L'uso medicinale delle specie vegetali selvatiche e coltivate nella tradizione popolare della bassa Val di Magra. <i>Mem. Acc. Lunigianese Sci., "G. Cappellini"</i> <b>1994-1995</b> , LXIV-LXV, 389-435.                                           | Tuscany                       |
| 219 | Maggi F. <i>Piante officinali dell'alto maceratese: usi e tradizioni popolari tra passato e presente. Proposte e Ricerche</i> <b>2006</b> , 56, 122-145.                                                                                                                                   | Marche                        |
| 220 | Mambrini, M.; Vicarelli, G.B. <i>Piante officinali dell'Amiata. Usi e tradizioni popolari Castell'Azzara (Grosseto); Cooperativa Agricola Forestale dei Comuni Amiadini</i> , 1983.                                                                                                        | Tuscany                       |
| 221 | Mancini, E.; De Martino, L.; Malova, H.; De Feo, V. Chemical composition and biological activities of the essential oil from <i>Calamintha nepeta</i> plants from the wild in southern Italy. <i>Nat. Prod. Commun.</i> <b>2013</b> , 8 (1), 139-142.                                      | Southern Italy                |
| 222 | Manzi, A. <i>I mugnoli di Pettorano sul Gizio. La gustosa verdura degli ortolani-pastori</i> . Riserva Naturale Regionale Monte Genzana-Alto Gizio 2015; pp. 32.                                                                                                                           | Abruzzi                       |
| 223 | Manzi, A. La cultura dei frassini da manna in Abruzzo. <i>Rivista Abruzzese</i> <b>1989</b> , 4, 355-357.                                                                                                                                                                                  | Abruzzi                       |
| 224 | Manzi, A. <i>Le piante alimentari in Abruzzo</i> ; Ed. Tinari: Villamagna (Chieti), Italy, 1999.                                                                                                                                                                                           | Abruzzi                       |
| 225 | Manzi, A. Piante spontanee utilizzate nell'alimentazione umana nel territorio di Gessopalena (Abruzzo). <i>Inform. Bot. Ital.</i> <b>1987</b> , 19, 257-264.                                                                                                                               | Abruzzi                       |
| 226 | * Marinoni, J. <i>Cucina e salute con le erbe spontanee nelle Tre Venezie</i> . Padova, 1984.                                                                                                                                                                                              | Veneto                        |
| 227 | Marra, L. <i>Monte Olacio</i> ; Ed. Libreria Colacchi: L'Aquila, Italy, 2005; pp. 131.                                                                                                                                                                                                     | Abruzzi                       |
| 228 | * Marsano, M. <i>Le piante officinali e i prodotti del sottobosco nel Goriziano</i> ; Ed. Tip. L. Lucchesi, 1941.                                                                                                                                                                          | Friuli Venezia Giulia         |
| 229 | Martelli, I. Braca A., Camangi F. Tradizioni etnofarmacobotaniche nel territorio del Gabbro (Livorno-Toscana). <i>Quad. Mus. St. Nat. Livorno</i> <b>2015</b> , 26, 15-38.                                                                                                                 | Tuscany                       |
| 230 | Martini, E. La Fitoterapia Popolare in Val Borbera (Appennino Ligure). <i>Webbia</i> <b>1982</b> , 35(1), 187-205.                                                                                                                                                                         | Piemonte                      |
| 231 | Martini, E. La Fitoterapia Popolare nell'alta Valle dell'Orba (Appennino Ligure). <i>Atti Acc. Ligure Sc. Lett. (Genova)</i> <b>1982</b> , 39, 1-25.                                                                                                                                       | Liguria                       |
| 232 | Maruca, G.; Spampinato, G.; Turiano, D.; Laghetti, G.; Musarella, C. M. Ethnobotanical notes about medicinal and useful plants of the Reventino Massif tradition (Calabria region, Southern Italy). <i>Genet Resour Crop Evol</i> <b>2019</b> , 66, 1027-1040.                             | Calabria                      |
| 233 | Mattalia, G.; Cassandra, L.; Quave, C.L.; Pieroni, A. Traditional uses of wild food and medicinal plants among Brigasc, Kyé, and Provençal communities on the Western Italian Alps. <i>Genet. Resour. Crop Evol.</i> <b>2013</b> , 60 (2): 115-132.                                        | Northern Italy (western Alps) |
| 234 | Mattalia, G.; Corvo, P.; Pieroni, A. The virtues of being peripheral, recreational, and transnational: local wild food and medicinal plant knowledge in selected remote municipalities of Calabria, Southern Italy. <i>Ethnobotany Research &amp; Applications</i> <b>2020</b> , 19: 1-20. | Calabria                      |
| 235 | Mattalia, G.; Söukand, R.; Corvo, P.; Pieroni, A. "We Became Rich and We Lost Everything": Ethnobotany of Remote Mountain Villages of Abruzzo and Molise, Central Italy. <i>Human Ecology</i> , <b>2021</b> , 1-8.                                                                         | Abruzzi, Molise               |
| 236 | Mattalia, G.; Söukand, R.; Corvo, P.; Pieroni, A. Blended divergences: local food and medicinal plant uses among Arbëreshë, Occitans, and autochthonous Calabrians living in Calabria, Southern Italy. <i>Plant Biosystems</i> <b>2020</b> , 154 (5), 615-626.                             | Calabria                      |
| 237 | Mattalia, G.; Söukand, R.; Corvo, P.; Pieroni, A. Dissymmetry at the Border: Wild Food and Medicinal Ethnobotany of Slovenes and Friulians in NE Italy. <i>Economic Botany</i> <b>2020</b> , 1-14.                                                                                         | Friuli Venezia Giulia         |
| 238 | Mattirolo, O. Phytoalimurgia Pedemontana (ossia Censimento delle specie vegetali alimentari della flora spontanea del Piemonte). <i>Annali della R. Accademia d'agricoltura di Torino</i> <b>1918</b> , 61.                                                                                | Italy                         |
| 239 | Mattirolo, O.; Gallino, B.; Pallavicini, G. <i>Phytoalimurgia pedemontana. Come alimentarsi con le piante selvatiche</i> ; Ed. Blu Edizioni: Torino, 2017; pp. 335.                                                                                                                        | Piemonte                      |
| 240 | Mautone, M.; De Martino, L.; De Feo, V. Ethnobotanical research in Cava de' Tirreni area, Southern Italy. <i>J. Ethnobiol. Ethnomed.</i> <b>2019</b> , 15 (1): 1-21.                                                                                                                       | Campania                      |
| 241 | Mazzola, P.; Nibali Lupica, S.; Bartolotta, L. Contributo alla conoscenza delle piante alimurgiche del Parco dei Nebrodi: le specie utilizzate nella tradizione popolare di Caronia (Messina). <i>Quad. Bot. Amb. Appl.</i> <b>2015</b> , 26, 3-10.                                        | Sicily                        |
| 242 | Mearelli, F.; Tardelli, C. Maremma mediterranea. <i>Erboristeria domani</i> <b>1995</b> , 45-57.                                                                                                                                                                                           | Tuscany                       |
| 243 | Medagli, P.; Accogli, R.; Turco, A.; Zuccarello, V.; Albano, A. Fiori spontanei del Salento. Guida al riconoscimento e alla tutela; Edizioni del Grifo, 2016; pp. 144.                                                                                                                     | Apulia                        |

|       |                                                                                                                                                                                                                                                                                                      |                       |
|-------|------------------------------------------------------------------------------------------------------------------------------------------------------------------------------------------------------------------------------------------------------------------------------------------------------|-----------------------|
| 244   | Menale, B.; Amato, G.; Di Prisco, C.; Muoio, R. Traditional uses of plants in North-Western Molise (Central Italy). <i>Delpinoa</i> <b>2006</b> , 48 , 29–36.                                                                                                                                        | Molise                |
| 245 * | Mezzena, R.T. <i>Frutti selvatici, mangerecci e velenosi del Carso</i> . Trieste, Fondazione Cassa di Risparmio di Trieste, 2002.                                                                                                                                                                    | Friuli Venezia Giulia |
| 246   | Molinaro, F. <i>Menesta asciaticizza. A tavola con le piante spontanee dell'Appennino meridionale</i> ; Ed. La bancarella: Piombino, Italy, 2011.                                                                                                                                                    | Southern Italy        |
| 247   | Montesano, V.; Negro, D.; Sarli, G.; De Lisi, A.; Laghetti, G.; Hammer, K. Notes about the uses of plants by one of the last healers in the Basilicata Region (South Italy). <i>J. Ethnobiol. Ethnomed.</i> <b>2012</b> , 8:15.                                                                      | Basilicata            |
| 248   | Morreale, F. <i>Piante Spontanee Alimentari in Sicilia</i> . Guida di fitoalimurgia; Ed. Casa Editrice Natura Sicula, 2018; pp. 319.                                                                                                                                                                 | Sicily                |
| 249   | Motti, R.; Antignani, V.; Idolo, M. Traditional Plant Use in the Phlegraean Fields Regional Park (Campania, Southern Italy). <i>Hum. Ecol.</i> <b>2009</b> , 37, 775–782.                                                                                                                            | Campania              |
| 250   | Motti, R.; Bonanomi, G.; Lanzotti, V.; Sacchi, R. The Contribution of Wild Edible Plants to the Mediterranean Diet: An Ethnobotanical Case Study Along the Coast of Campania (Southern Italy). <i>Economic Botany</i> , <b>2020</b> , 74(3), 249-272.                                                | Campania              |
| 251   | Motti, R.; Motti, P. An Ethnobotanical Survey of Useful Plants in the Agro Nocerino Sarnese (Campania, Southern Italy). <i>Hum. Ecol.</i> <b>2017</b> , 45 , 865–878.                                                                                                                                | Campania              |
| 252   | Musarella, C.M.; Paglianiti, I.; Cano-Ortiz, A.; Spampinato, G. Indagine etnobotanica nel territorio del Poro e delle Preserre Calabresi (Vibo Valentia, S-Italia). <i>Atti Soc. Tosc. Sci. Nat., Mem. , Serie B</i> , <b>2019</b> , 126 , 13-28.                                                    | Calabria              |
| 253   | Napoli, M. Usi popolari di Barlia robertiana (Loisel.) W. Greut. (Orchidaceae) nel territorio di Santo Pietro di Caltagirone (Catania). In <i>Etnobotanica nella Provincia di Catania con Atti del Convegno "Andar per verdure"</i> ; Nuova Zangara Stampa Editrice: Linguaglossa, Italy, 2002.      | Sicily                |
| 254   | Nardelli, G. M. <i>Cultura e tradizione. Demomedicina nell'alta Umbria</i> . Provincia di Perugia. 1987.                                                                                                                                                                                             | Umbria                |
| 255   | Nardone, D. Piante e frutti spontanei nel Salento. In <i>Etnobotanica nella Provincia di Catania con Atti del Convegno "Andar per verdure"</i> ; Nuova Zangara Stampa Editrice: Linguaglossa, Italy, 2002.                                                                                           | Apulia                |
| 256   | Navoni, G.; Vietina, B.; Bracelli, F.; Ardara, N. <i>Erbe spontanee commestibili nella tradizione massese</i> ; Ceccotti Ed.: Massa, Italy, 1997.                                                                                                                                                    | Tuscany               |
| 257   | Nebel, S.; Heinrich, M. Ta chòrta: A comparative ethnobotanical-linguistic study of wild food plants in a graecanic area in Calabria, Southern Italy. <i>Economic Botany</i> , <b>2009</b> , 63 (1), 78-92.                                                                                          | Calabria              |
| 258   | Nebel, S.; Heinrich, M. The use of wild edible plants in the Graecanic area in Calabria, Southern Italy. <i>Ethnobotany of the New Europe</i> , <b>2010</b> , 172-188.                                                                                                                               | Calabria              |
| 259   | Nebel, S.; Pieroni, A.; Heinrich, M. Ta Chorta: Wild edible greens used in the Graecanic area in Calabria, Southern Italy. <i>Appetite</i> , <b>2006</b> , 47(3), 333–342.                                                                                                                           | Calabria              |
| 260   | Ossato, R.; Chiesura, F.; Scortegagna, S. Ricerche etnobotaniche nel territorio vicentino: utilizzazione di piante spontanee e coltivate nella Valle di Laghi (Prealpi Vicentine – Veneto). <i>Natura Vicentina</i> <b>2007</b> , 11: 145-158.                                                       | Veneto                |
| 261   | Pallabazzer, V. Infanzia, Natura ed economia nelle valli dolomitiche fino alla seconda guerra mondiale. <i>Atti Ac. Rov. Agiati</i> <b>1997</b> , VII (7): 141-150.                                                                                                                                  | Veneto                |
| 262   | Palmese, M. T.; Uncini Manganelli, R. E.; Tomei, P. E. An ethnoparmacobotanical survey in the Sarrabus district (South-east Sardinia). <i>Fitoterapia</i> <b>2001</b> , 72 , 619-643.                                                                                                                | Sardinia              |
| 263   | Paoletti, M. G.; Dreon, A. L.; Lorenzoni, G.G. Pistic, Traditional Food from Western Friuli, N.E. <i>Italy Economic Botany</i> <b>1995</b> , 49 , 26-30.                                                                                                                                             | Friuli Venezia Giulia |
| 264   | Pasta S, Garfi G, La Bella F, Rühl J, Carimi F. An overview on the human exploitation of Sicilian native edible plants. In: Davis ER, editor. <i>Wild plants: identification, uses and conservation</i> . Nova Science Publishers Press: Hauppauge, NY, 2011; pp. 1–74.                              | Basilicata            |
| 265   | Pasta, S.; La Rosa, A.; Garfi, G.; Marcenò, C.; Gristina, A.S.; Carimi, F.; Guarino, R. An Updated Checklist of the Sicilian Native Edible Plants: Preserving the Traditional Ecological Knowledge of Century-Old Agro-Pastoral Landscapes. <i>Frontiers in Plant Science</i> <b>2020</b> , 11: 388. | Sicily                |
| 266 * | Pedrotti, G., Bellomaria, B. <i>Piante officinali spontanee delle Marche</i> ; Atti I Convegno Naz. Erboristeria e Piante Officinali. Recanati <b>1978</b> , pp. 71-74.                                                                                                                              | Marche                |
| 267   | Pedrotti, G.; Bertoldi, V. <i>Nomi dialettali delle piante indigene del Trentino e della Ladinia dolomitica presi in esame dal punto di vista della botanica della linguistica e del folklore</i> . Ed. G. Monauni, Trento, 1930.                                                                    | Trentino Alto-Adige   |

|       |                                                                                                                                                                                                                                                                                                                  |            |
|-------|------------------------------------------------------------------------------------------------------------------------------------------------------------------------------------------------------------------------------------------------------------------------------------------------------------------|------------|
| 268   | Perno, L.; Corsi, G.; Miraldi, E. Aspetti etnobotanici nel territorio di Rio dell'Elba. <i>Atti Soc. toss. Sci. nat., Mem.</i> , Serie 8, <b>1997</b> , 104 , 43-51.                                                                                                                                             | Tuscany    |
| 269   | Perrino, E.V.; Signorile, G. Indagini etnobotaniche in alcune località della Puglia Centrale. <i>Boll. Mus. Ist. Biol. Univ. Genova</i> , <b>2011</b> , 73.                                                                                                                                                      | Apulia     |
| 270   | Perrone, C.; Medagli, P. Le forze della natura. Le Piante nel territorio gallipolino tra Storia, Mitologia e Folklore. Coordinamento editoriale Centro Regionale Servizi Educativi e Culturali C.R.S.E.C. LE/48 - Gallipoli 2006.                                                                                | Apulia     |
| 271 * | Persico, G.; Carra, G. <i>Erbe in tavola. Piante spontanee commestibili della Pianura Padana. Note botaniche e di cucina</i> ; Ed. Tre Lune, 2003.                                                                                                                                                               | Italy      |
| 272   | Pezzotta, R. <i>Saperi naturalistici locali</i> ; Centro Educazione Ambientale di Cerreto di Spoleto, Centro per la Documentazione e la Ricerca Antropologica in Valnerina. Centro Stampa Regionale: Perugia, Italy, 1994.                                                                                       | Umbria     |
| 273   | Picchi G., Pieroni A. <i>Atlante dei prodotti tipici</i> . Le erbe; Istituto Nazionale di Sociologia Rurale, RAI, Agraed.: Roma, Italy, 2005.                                                                                                                                                                    | Italy      |
| 274   | Picchi, G. <i>Terra e cibo della Marca d'Ancona</i> . Provincia di Ancona, Assessorato alle Politiche Agricole: Ancona, Italy, 2002.                                                                                                                                                                             | Marche     |
| 275   | Pieroni, A. "Erbi boni" nelle tradizioni gastronomiche garfagnine. In <i>Erbi boni, erbi degli stregghi/ Good weeds, witches'weed</i> s. Atti del Seminario di Studio, Galliciano (LU), maggio 1997: Pieroni, A., Ed; Experiences Verlag: Köln, Germany, 1998; pp. 3-18.                                         | Tuscany    |
| 276   | Pieroni, A. <i>Etnobotanica a Castelmezzano. Manuale sull'uso delle erbe officinali in un borgo della Lucania, Accettura, Italy</i> . Ed. Le Macine 2007                                                                                                                                                         | Basilicata |
| 277   | Pieroni, A. Evaluation of the cultural significance of wild food botanicals traditionally consumed in Northwestern Tuscany, Italy. <i>Journal of Ethnobiology</i> <b>2001</b> , 21 (1), 89-104                                                                                                                   | Tuscany    |
| 278   | Pieroni, A. Gathered wild food plants in the upper valley of the Serchio river (Garfagnana), Central Italy. <i>Economic botany</i> <b>1999</b> , 53 (3), 327-341.                                                                                                                                                | Tuscany    |
| 279   | Pieroni, A. Medicinal plants and food medicines in the folk traditions of the upper Lucca Province, Italy. <i>J. Ethnopharmacology</i> <b>2000</b> , 70, 235-273.                                                                                                                                                | Tuscany    |
| 280   | Pieroni, A. Piante spontanee della tradizione ed immaginario collettivo in Alta Garfagnana (Lucca): un centro di documentazione sulla cultura orale. <i>Inf. Bot. Italiano</i> <b>1999</b> , 31 (1-3), 183-189.                                                                                                  | Tuscany    |
| 281   | Pieroni, A. Toxic plants as food plants in the traditional uses of the Eastern Apuan Alps Region, North-West Tuscany, Italy. In <i>Il cibo ed il corpo. Dal cibo alla cultura, dalla cultura il cibo</i> ; Guerci, A., Ed; Erga ed.: Genova, Italy, 1999; pp. 262-272.                                           | Tuscany    |
| 282   | Pieroni, A. Wild food plants and Arbëresh women in Lucania, Southern Italy. In <i>Women and plants: Gender relations in biodiversity management and conservation</i> ; Howard, P.L., Ed.; The University of Chicago Press.: Chicago, 2003; pp. 66-82.                                                            | Basilicata |
| 283   | Pieroni, A.; Giusti, M.E. Alpine ethnobotany in Italy: traditional knowledge of gastronomic and medicinal plants among the Occitans of the upper Varaita valley, Piedmont. <i>J. Ethnobiol. Ethnomed.</i> <b>2009</b> , 5 :32                                                                                    | Piemonte   |
| 284   | Pieroni, A.; Giusti, M.E. Spazio e paesaggio nell'immaginario legato alle erbe delle comunità Arbreshe del Vulture in Lucania. In <i>Tradizioni Popolari. Atti del Convegno "Immaginario, Territorio, Paesaggio"</i> , Piazza al Serchio (Lucca), 9 Dicembre 2000; Experiences Verlag: Koln, <b>2002</b> : 5-11. | Basilicata |
| 285   | Pieroni, A.; Nebel, S.; Quave, C.; Munz, H.; Heinrich, M. Ethnopharmacy of the ethnic Albanians of northern Basilicata, Italy. <i>Fitoterapia</i> <b>2002</b> , 73 , 217-241.                                                                                                                                    | Basilicata |
| 286   | Pieroni, A.; Nebel, S.; Quave, C.; Münz, H.; Heinrich, M. Ethnopharmacology of liakra, traditional weedy vegetables of the Arbëreshë of the Vulture area in southern Italy. <i>J. Ethnopharmacol.</i> <b>2002</b> , 81 , 165-185.                                                                                | Basilicata |
| 287   | Pieroni, A.; Nebel, S.; Santoro, R.C.; Heinrich, M. Food for two seasons: culinary uses of non-cultivated local vegetables and mushrooms in a south Italian village. <i>Int. J. Food Sci. Nutr.</i> <b>2005</b> , 56 , 245-272.                                                                                  | Basilicata |
| 288   | Pieroni, A.; Quave, C.L. Functional food or food medicine? On the consumption of wild plants among Albanians and Southern italians in Lucania. In <i>Eating and healing: traditional food as medicine</i> ; Pieroni, A., Price, L.L., Eds.; Haworth Press: Binghamton, New York, 2006; pp. 101-129.              | Basilicata |

|     |                                                                                                                                                                                                                                                                                                                                        |                       |
|-----|----------------------------------------------------------------------------------------------------------------------------------------------------------------------------------------------------------------------------------------------------------------------------------------------------------------------------------------|-----------------------|
| 289 | Pieroni, A.; Quave, C.L.; Santoro, R.C. Folk pharmaceutical knowledge in the territory of the Dolomiti Lucane, inland southern Italy. <i>J. Ethnopharmacol.</i> <b>2004</b> , <i>95</i> , 373–384.                                                                                                                                     | Basilicata            |
| 290 | Pignone, D.; Laghetti, G. On sweet acorn ( <i>Quercus</i> spp.) cake tradition in Italian cultural and ethnic islands. <i>Genet Resour Crop Evol.</i> <b>2010</b> , <i>57</i> , 1261–1266.                                                                                                                                             | Sardinia              |
| 291 | Pinna, C. Contributo allo studio e valorizzazione del pane di ghiande Sardegna. <i>Medit.</i> <b>2015</b> , <i>37</i> , 44–52.                                                                                                                                                                                                         | Sardinia              |
| 292 | Piras, G. Elementi della dendroflora sarda impiegati nella tradizione popolare di Putifigari e Villanova Monteleone (Sardegna Nord-Occidentale). <i>Cultural heritage and sustainable forest management: the role of traditional knowledge</i> <b>2006</b> , 506–516.                                                                  | Sardinia              |
| 293 | Poggio, L. <i>Piante officinali della Valle d'Aosta</i> ; Ed. Neos-Tipolito Subalpina 2006; pp. 108.                                                                                                                                                                                                                                   | Aosta Valley          |
| 294 | Quave, C.L.; Pieroni, A. Traditional health care and food and medicinal plant use among historic Albanian migrants and Italians in Lucania, Southern Italy. In <i>Traveling cultures and plants. The ethnobiology and ethnopharmacy of human migrations</i> ; Pieroni, a., Vandebroek, I, Eds.; Berghahn: New York, 2007; pp. 204–227. | Basilicata            |
| 295 | Raimondo, F.M. Le piante della flora locale nella tradizione popolare delle Madonie. <i>Giorn. Bot. Ital.</i> <b>1980</b> , <i>114</i> , 142.                                                                                                                                                                                          | Sicily                |
| 296 | Raimondo, F.M.; Lentini, F. Indagini etnobotaniche in Sicilia. I. Le piante della flora locale nella tradizione popolare delle Madonie (Palermo). <i>Naturalista siciliano (Palermo)</i> <b>1990</b> , s. IV, 3–4, 77–99.                                                                                                              | Sicily                |
| 297 | Ranfa, A.; Bodesmo, M. An Ethnobotanical investigation of traditional knowledge and uses of edible wild plants in the Umbria Region, Central Italy. <i>J. Appl. Bot. Food Qual.</i> <b>2017</b> , <i>90</i> , 246–258.                                                                                                                 | Umbria                |
| 298 | Ranfa, A.; Maurizi, A.; Romano, B.; Bodesmo, M. The importance of traditional uses and nutraceutical aspects of some edible wild plants in human nutrition: the case of Umbria (central Italy). <i>Plant Biosyst.</i> <b>2014</b> , <i>148</i> , 297–306.                                                                              | Umbria                |
| 299 | Renna, M. Wild edible plants as a source of mineral elements in the daily diet. <i>Progr. Nutr.</i> <b>2017</b> , <i>19</i> , 219–222.                                                                                                                                                                                                 | Italy                 |
| 300 | Renna, M.; Cocozza, C.; Gonnella, M.; Abdelrahman, H.; Santamaria, P. Elemental characterization of wild edible plants from country side and urban areas. <i>Food Chem.</i> <b>2015</b> , <i>177</i> , 29–36.                                                                                                                          | Apulia                |
| 301 | Riccardo S. <i>Le piante spontanee eduli</i> ; Ed. Battiato: Catania, Italy, 1921.                                                                                                                                                                                                                                                     | Italy                 |
| 302 | * Rieppi, A. <i>Piante mangerecce spontanee del Friuli</i> ; Comitato Nazionale Forestale, Italy, 1941.                                                                                                                                                                                                                                | Friuli Venezia Giulia |
| 303 | Rinaldi, A. Nomi volgari in uso nella valle di Ussita (Macerata). <i>Giorn. Bot. Ital.</i> <b>1965</b> , <i>72</i> (4–6), 680–682.                                                                                                                                                                                                     | Marche                |
| 304 | Rodato, S. <i>Piante spontanee utilizzate in alimentazione</i> ; G.S. Stampa: Caselle d'Asolo (TV), Italy, 1989.                                                                                                                                                                                                                       | Veneto                |
| 305 | Rolli, E.; Belli, B.; Bianchi, A. Le food plants in Toscana: tradizione e scienza nutraceutica. <i>Natural</i> <b>2014</b> , <i>1</i> , 1–47.                                                                                                                                                                                          | Tuscany               |
| 306 | Rosati, A. Le più note piante spontanee di stagione: il chenopodio ( <i>Chenopodium album</i> ). <i>Vita in campagna</i> <b>2005</b> , <i>6</i> , 59–61.                                                                                                                                                                               | Italy                 |
| 307 | * Rovesti, G. <i>Le piante aromatiche e medicinali spontanee della Provincia di Porto Maurizio</i> ; I Ed. 1922, Ed. Zem, 2010.                                                                                                                                                                                                        | Liguria               |
| 308 | Salerno, G.; Guarrera, P.M. Ricerche etnobotaniche nel Parco Nazionale del Cilento e Vallo di Diano: il territorio di Castel San Lorenzo (Campania, Salerno). <i>Inf. Bot. Ital.</i> 2008, <i>40</i> (2), 165–181.                                                                                                                     | Campania              |
| 309 | Salerno, G.; Guarrera, P.M.; Caneva, G. Agricultural domestic and handicraft folk uses of plants in the Thyrrenian sector of Basilicata (Italy). <i>J. Ethnobiol. Ethnomed.</i> <b>2005</b> , <i>1</i> :2.                                                                                                                             | Basilicata            |
| 310 | Sansanelli, S.; Ferri, M.; Salinitro, M.; Tassoni, A. Ethnobotanical survey of wild food plants traditionally collected and consumed in the Middle Agri Valley (Basilicata region, Southern Italy). <i>J. Ethnobiol. Ethnomed.</i> <b>2017</b> , <i>13</i> : 50                                                                        | Basilicata            |
| 311 | Sansanelli, S.; Tassoni, A. Wild food plants traditionally consumed in the area of Bologna (Emilia Romagna region, Italy). <i>J. Ethnobiol. Ethnomed.</i> <b>2014</b> , <i>10</i> : 69                                                                                                                                                 | Emilia Romagna        |
| 312 | Savo, V. <i>Usi delle piante in costiera amalfitana. Uses of plants in the Amalfi coast.</i> Ed. Officine Zephireo: Amalfi, Italy, 2010; pp. 107.                                                                                                                                                                                      | Campania              |
| 313 | Savo, V.; Caneva, G.; Guarrera, P.M.; Reedy, D. Folk phytotherapy of the Amalfi Coast (Campania, Southern Italy). <i>J. Ethnopharmacol.</i> <b>2011</b> , <i>135</i> , 376–392.                                                                                                                                                        | Campania              |

|     |                                                                                                                                                                                                                                                                                                                                                  |                       |
|-----|--------------------------------------------------------------------------------------------------------------------------------------------------------------------------------------------------------------------------------------------------------------------------------------------------------------------------------------------------|-----------------------|
| 314 | Savo, V.; Guarrera, P.M. Comprensorio Tolfetano-Cerite-Manziate. Specie vegetali tipiche di uso popolare. Ed. Gangemi, Rome, 2010.                                                                                                                                                                                                               | Latium                |
| 315 | Savo, V.; Salomone, F.; Bartoli, F.; Caneva, G. When the local cuisine still incorporates wild food plants: the unknown traditions of the Monti Picentini Regional Park (Southern Italy). <i>Economic Botany</i> <b>2019</b> , 73 (1), 28-46.                                                                                                    | Campania              |
| 316 | Scherrer Avalla, M.; Motti, R.; Weckerle Caroline, S. Traditional plant use in the areas of Monte Vesole and Ascea, Cilento National Park (Campania, Southern Italy). <i>J. Ethnopharmacol.</i> <b>2005</b> , 97, 129-143.                                                                                                                       | Campania              |
| 317 | Schicchi, R.; Geraci, A. Verdure Spontanee di Sicilia. Guida al Riconoscimento, alla Raccolta e alla Preparazione; Ed. IDIMED: Palermo, Italy, 2016.                                                                                                                                                                                             | Sicily                |
| 318 | Scortegagna, S. <i>Flora Popolare Veneta - Nomi e usi tradizionali delle piante nel Veneto</i> . Ed. WBA Monographs 3: Verona, Italy, 2014; pp. 704.                                                                                                                                                                                             | Veneto                |
| 319 | Sella, A. <i>Flora popolare biellese. Nomi dialettali, tradizioni e usi locali</i> . Collana della Fondazione Sella. Ed. Dell'Orso: Alessandria, Italy, 1992.                                                                                                                                                                                    | Piemonte              |
| 320 | Selva, A.M. Piante officinali nella medicina popolare del Carso Isontino. <i>Herbora</i> , Atti delle giornate 23-38 Maggio 1979, Verona; pp. 334-337.                                                                                                                                                                                           | Friuli Venezia Giulia |
| 321 | Servettaz, O.; Colombo, M. L.; Banfi, E. Osservazioni sull'uso delle piante officinali nel Medio Novarese. <i>Atti dell'Istituto Botanico dell'Università e Laboratorio Crittogamico Pavia</i> <b>1979</b> , XIII, 181-202.                                                                                                                      | Piemonte              |
| 322 | Signorello, P. <i>Piante Spontanee Siciliane Mangerecce e Velenose</i> ; Stampa Massimino, 2015; pp. 191.                                                                                                                                                                                                                                        | Sicily                |
| 323 | Signorini, M.A.; Lombardini, C.; Bruschi, P.; Vivona, L. Conoscenze etnobotaniche e saperi tradizionali nel territorio di San Miniato (Pisa). <i>Atti Soc. tosc. Sci. nat. Mem.</i> <b>2007</b> , Serie B, 114, 65-83.                                                                                                                           | Tuscany               |
| 324 | Signorini, M.A.; Piredda, M.; Bruschi, P. Plants and traditional knowledge: An ethnobotanical investigation on Monte Ortobene (Nuoro, Sardinia). <i>J. Ethnobiol. Ethnomed.</i> <b>2009</b> , 5: 6.                                                                                                                                              | Sardinia              |
| 325 | Taffetani, F. <i>Rugni Speragne e Crispigne. Piante spontanee negli usi e nelle tradizioni del territorio maceratese</i> . Fondazione Cassa di Risparmio della Provincia di Macerata, 2005.                                                                                                                                                      | Marche                |
| 326 | Tammaro, F. <i>Flora Officinale d'Abruzzo Giunta Regionale d'Abruzzo</i> . Centro Servizi Culturali, Chieti, 1984.                                                                                                                                                                                                                               | Abruzzi               |
| 327 | Tammaro, F.; Pietrocola, L. Usi popolari delle piante in Abruzzo. <i>Quaderni della Rivista Abruzzese</i> <b>1975</b> , 4, 1-56.                                                                                                                                                                                                                 | Abruzzi               |
| 328 | Tomei, P. E.; Maccioni, S.; Parmigiani, M. L'uso medicinale delle piante nella tradizione popolare della Lunigiana. Il contributo. <i>Mem. Acc. Lunigianese Sci. G. Cappellini, Sci. Mat., fis. e nat.</i> <b>1997/1999</b> , 67-69, 209-221.                                                                                                    | Tuscany               |
| 329 | Tomei, P.; Camangi, F. La "cucina" carrarese e messese: aspetti botanici e alimurgici. <i>Paralleli e Meridiani</i> <b>2004</b> , 2 (1), 55-66.                                                                                                                                                                                                  | Tuscany               |
| 330 | Tomei, P.; Camangi, F. <i>Tradizioni alimurgiche in Toscana. Piante selvatiche e coltivate nella preparazione delle zuppe</i> ; Ed. Maria Pacini Fazzi, Lucca, Italy, 2014.                                                                                                                                                                      | Tuscany               |
| 331 | Tomei, P.E.; Gaspari G. Indagine sulle zone umide della Toscana. XVI. LE piante officinali dei bacini palustri della Toscana Settentrionale. <i>Atti Soc. Tosc. Nat., Mem.</i> , Serie B <b>1981</b> , 88, 175-194.                                                                                                                              | Tuscany               |
| 332 | Tomei, P.E.; Lippi, A.; Uncini Manganelli, R.E. L'uso delle specie vegetali spontanee nella preparazione delle zuppe di magro in Lucca (LU). In <i>Funghi, tartufi ed erbe mangerecce</i> . Convegno Internazionale. Atti. L'Aquila 28 settembre, 1 ottobre. Accademia Italiana della cucina e Università degli studi de l'Aquila 1996; pp. 243. | Tuscany               |
| 333 | Tomei, P.E.; Monti, G.; Onnis, A. <i>Specie vegetali coltivate e spontanee di uso alimentare e medicinale nella tradizione popolare dell'alta Garfagnana</i> . Dipartimento di Scienze Botaniche dell'Università di Pisa. Ed. Pacini: Pisa, Italy, 1988; pp. 48.                                                                                 | Tuscany               |
| 334 | Tomei, P.E.; Trimarchi, S. <i>Piante d'uso etnobotanico in Toscana</i> ; Ed Maria Pacini Fazzi, 2017; pp. 396.                                                                                                                                                                                                                                   | Tuscany               |
| 335 | Tomei, P.E.; Uncini Manganelli, R.E. (a cura di) <i>Etnobotanica nel padule di Fucecchio</i> 2005 <a href="http://www.parchiagricoltura.it/news.html">http://www.parchiagricoltura.it/news.html</a>                                                                                                                                              | Tuscany               |
| 336 | Uncini Manganelli, R.E., Camangi, F., Tomei, P.E. <i>L'uso delle erbe nella tradizione rurale della Toscana</i> ; ARSIA Regione Toscana: Firenze, Italy, 2007; Volumes 1-3.                                                                                                                                                                      | Tuscany               |

|       |                                                                                                                                                                                                                                                                    |               |
|-------|--------------------------------------------------------------------------------------------------------------------------------------------------------------------------------------------------------------------------------------------------------------------|---------------|
| 337   | Uncini Manganelli, R.E.; Camangi, F.; Tomei, P.E. Primi appunti su alcune tradizioni alimentari nel territorio di Massaciuccoli (LU). In <i>Il Bacino del Massaciuccoli</i> . Ed. Pacini: Pisa, Italy, 1999; pp. 49-53.                                            | Tuscany       |
| 338   | Uncini Manganelli, R.E.; Tomei, P.E. Indagini farmaco-botaniche in Garfagnana (Lucca): il versante apuano. <i>Atti Soc. Tosc. Sci. Nat., Mem., Serie B</i> <b>1996</b> , 103, 63-80.                                                                               | Tuscany       |
| 339   | Uncini Manganelli, R.E.; Tomei, P.E. <i>Indagini etno-farmacobotaniche nei Colli Pisani: da Guasticce a Palaia</i> ; Dipartimento di Scienze Botaniche dell'Universita: Pisa, Italy, 1997; pp. 86-106.                                                             | Tuscany       |
| 340   | Uncini Manganelli, R.E.; Tomei, P.E. Indagini etno-farmacobotaniche nel Pistoiese. <i>Atti Mem. Accad. Tosc. Sci. Lett. Colombaria</i> <b>1998</b> , 63, N.S. 49, 135-158.                                                                                         | Tuscany       |
| 341   | Uncini Manganelli, R.E.; Tomei, P.E. Indagini farmaco-botaniche in Garfagnana (Lucca): il versante appenninico. <i>Atti Soc. Tosc. Sci. Nat., Mem., Serie B</i> <b>1995</b> , 102, 3-18.                                                                           | Tuscany       |
| 342   | Uncini Manganelli, R.E.; Tomei, P.E. <i>Le piante selvatiche nell'alimentazione e nella medicina popolare dei Colli Pisani</i> ; ETS: Pisa, Italy, 1999.                                                                                                           | Tuscany       |
| 343 * | Vaglio, M. <i>Erbe delle valli Alpine. Alla scoperta di 260 piante commestibili</i> ; Priuli & Verlucca: Scarmagno (TO), Italy, 2014; pp. 253.                                                                                                                     | Italy         |
| 344   | Vallariello, G. <i>Etnobotanica dell'isola d'Ischia</i> (Napoli, Italia). <i>Delpinoa</i> <b>2003</b> , 45, 233-243.                                                                                                                                               | Campania      |
| 345   | Vannelli, S. <i>Erbe selvatiche e commestibili della Sardegna</i> ; S.I., AM&D: Cagliari, Italy, 1998; pp. 192                                                                                                                                                     | Sardinia      |
| 346   | Vanzani, P.; Rossetto, M.; De Marco, V.; Sacchetti, L.E.; Paoletti, M.G.; Rigo, A. Wild Mediterranean plants as traditional food: A valuable source of antioxidants. <i>J. Food Sci.</i> 2011, 76(1), C46-C51.                                                     | Mediterranean |
| 347   | Veri, L. Flora utile dei Monti Simbruini. <i>Micologia e Vegetazione mediterranea</i> <b>1997</b> , XII suppl. 1.                                                                                                                                                  | Latium        |
| 348   | Vitalini, S.; Iriti, M.; Puricelli, C.; Ciuchi, D.; Segale, A.; Fico, G. Traditional knowledge on medicinal and food plants used in Val San Giacomo (Sondrio, Italy)—An alpine ethnobotanical study. <i>Journal of Ethnopharmacology</i> , 2013, 145 (2), 517-529. | Lombardia     |
| 349   | Vitalini, S.; Puricelli, C.; Mikerezi, I.; Iriti M. Plants, people and traditions: Ethnobotanical survey in the Lombard Stelvio national park and neighbouring areas (central Alps, Italy). <i>Journal of Ethnopharmacology</i> <b>2015</b> , 173, 435-458.        | Lombardia     |
| 350   | Vitalini, S.; Tomè, F.; Fico, G. Traditional uses of medicinal plants in Valvestino (Italy) <i>Journal of Ethnopharmacology</i> <b>2009</b> , 121 : 106-116.                                                                                                       | Lombardia     |
| 351   | Zampiva, F. <i>Erbario veneto: cultura, usi e tradizioni delle piante e delle erbe più note</i> ; Egida Ed.: Vicenza, Italy, 1999.                                                                                                                                 | Veneto        |
| 352   | Zampiva, F. Erbe e piante della Lessinia. <i>Erboristeria domani</i> <b>1981</b> , 9, 17-25.                                                                                                                                                                       | Veneto        |
| 353   | Zampiva, F. Etnobotanica ed etnomedicina: le erbe, le piante e i loro usi in Lessinia. In AA. VV. <i>Civiltà Cimbra</i> ; Bi & Gi ed.: Verona, Italy, 1983; pp. 175-183.                                                                                           | Veneto        |
| 354   | Zampiva, F. Le erbe nella cucina popolare veneta. <i>Erboristeria Domani</i> <b>1983</b> , 4, 60-69.                                                                                                                                                               | Veneto        |
| 355   | Zanin, G.; Zuin, M.C.; Vigolo, M. T.; Zanin, G. <i>Il giardino fitoalimurgico per la valorizzazione delle piante spontanee</i> ; Veneto Agricoltura: Legnaro (PD), Italy, 2008.                                                                                    | Veneto        |
| 356   | Zanotti, E.; Gorno, G.; Paletti, G. Le piante selvatiche commestibili con note sulle loro proprietà medicinali e ricette di cucina. <i>I quaderni del Parco</i> <b>2012</b> , 9.                                                                                   | Lombardia     |
| 357   | Zuin, M.C. <i>Il giardino fitoalimurgico per la valorizzazione delle piante spontanee</i> ; Veneto Agricoltura: Legnaro (PD), Italy, 2010.                                                                                                                         | Veneto        |
| 358   | Zuin, M.C.; Zanin, G.; Zanin, G. Il giardino fitoalimurgico per la valorizzazione delle piante spontanee. <i>Agribusiness Paesaggio &amp; Ambiente</i> <b>2006</b> , IX (1), 75-82.                                                                                | Veneto        |
