# Supplementary material for: Design a Database of Italian Vascular Alimurgic Flora (AlimurgITA): Preliminary Results
Source: MDPI journal article supplement (doi:10.3390/plants10040743), 2021-04-10
Supplement: s1 [file s1]

**Supplementary Materials Table S3.** Biological Spectrum of subforms.

| LIFE FORMS | SUBFORMS | N   | %     |
|------------|----------|-----|-------|
| Ch         | Ch frut  | 18  | 1.63  |
|            | Ch rept  | 12  | 1.09  |
|            | Ch succ  | 8   | 0.73  |
|            | Ch suffr | 47  | 4.26  |
| G          | G bulb   | 64  | 5.80  |
|            | G rad    | 3   | 0.27  |
|            | G rhiz   | 68  | 6.17  |
| H          | H bienn  | 83  | 7.52  |
|            | H caesp  | 13  | 1.18  |
|            | H rept   | 7   | 0.63  |
|            | H ros    | 66  | 5.98  |
|            | H scand  | 5   | 0.45  |
|            | H scap   | 261 | 23.66 |
| He         | He       | 1   | 0.09  |
| Hy         | Hy nat   | 1   | 0.09  |
|            | Hy rad   | 14  | 1.27  |
| P          | NP       | 38  | 3.45  |
|            | P caesp  | 65  | 5.89  |
|            | P lian   | 9   | 0.82  |
|            | P scap   | 48  | 4.35  |
|            | P succ   | 1   | 0.09  |
| T          | T caesp  | 1   | 0.09  |
|            | T par    | 4   | 0.36  |
|            | T rept   | 9   | 0.82  |
|            | T ros    | 2   | 0.18  |
|            | T scap   | 255 | 23.12 |
